14 **rejuvenation effects induced by reprogramming in the transcriptome were**  
15 **mainly independent of pluripotency gain. Decoupling of these processes al-**  
16 **lowed predicting interventions mimicking reprogramming-induced rejuvena-**  
17 **tion (RIR) without affecting somatic cell identity, including an anti-inflammatory**  
18 **compound osthol, *ATG5* overexpression, and *C6ORF223* knockout. Overall,**  
19 **we revealed specific molecular mechanisms associated with RIR at the gene**  
20 **expression level and developed tools for discovering interventions that support**  
21 **the rejuvenation effect of reprogramming without posing the risk of neoplasia.**

## 22 **Introduction**

23 Aging is associated with the buildup of molecular damage and a gradual loss of function, culmi-  
24 nating in chronic age-related diseases and ultimately death (1). Searching for safe and efficient  
25 interventions that can slow down or partially reverse the aging process is a major challenge in  
26 the aging field (2–6). In this regard, reprogramming of somatic cells into induced pluripotent  
27 stem cells (iPSCs) has been proposed as a candidate longevity intervention due to its potential  
28 to rejuvenate cells in a targeted way (7, 8).

29 Pluripotency can be achieved *in vitro* by the ectopic expression of four transcription factors:  
30 OCT4, SOX2, KLF4, and MYC, known as OSKM or Yamanaka factors (YFs). It was demon-  
31 strated that OSKM support the generation of murine iPSCs (9) using retroviral transduction as a  
32 delivery system and mouse embryonic fibroblasts (MEF) as the initial cell culture. Although this  
33 original experiment was inefficient in terms of the percentage of cells that terminally achieved  
34 the pluripotent state (<0.1%), more advanced *in vitro* approaches resulted in a greatly improved  
35 efficiency, e.g. by down-regulation of methyl CpG-binding domain 3 (MBD3) levels (10). In  
36 parallel, other approaches have been developed to induce pluripotency. In particular, the expres-

37 sion of seven other transcription factors (7F: *Jdp2-Jhdm1b-Mkk6-Glis1-Nanog-Essrb-Sall4*) re-  
38 sulted in high efficiency of reprogramming (11). Therefore, it appears that the reprogramming  
39 process can be attained by using different cell culture conditions, transcription factors, and small  
40 molecules (12).

41 *In vivo* cell reprogramming could be accomplished by using transgenic mice with doxycycline-  
42 inducible OSKM (13, 14). However, continuous expression of OSKM factors in mice leads to  
43 severe forms of teratoma. Partial reprogramming protocols can overcome this problem. Some  
44 of these techniques rely on the incomplete set of reprogramming factors, e.g., OSK reprogram-  
45 ming (15), while others are based on a transient or temporarily controlled expression of OSKM  
46 factors (16–18). The problem of oncogenesis during *in vivo* reprogramming is associated with  
47 the loss of somatic cell identity in pluripotent cells. Thus, it is crucial to avoid the reset of  
48 the somatic epigenetic program in order to make this technique applicable in clinical practice.  
49 Recent *in vitro* experiments (19, 20) show that the decrease in epigenetic age of reprogrammed  
50 cells measured by epigenetic aging clocks (21) occurs mostly prior to the stabilization phase  
51 when the pluripotent state is established. However, even a short-term use of OSKM factors has  
52 been shown to produce the detectable subpopulation of cells where late-stage pluripotent genes  
53 are expressed (22). Therefore, independent interventions that would support Reprogramming-  
54 Induced Rejuvenation (RIR) without inducing pluripotency may be of a high clinical value.

55 Since the first reprogramming experiment conducted in 2006, a massive amount of high-throughput  
56 molecular data have accumulated, shedding light on the details of gene regulatory pathways  
57 and their dynamics during reprogramming. These data comprise transcriptome, methylome,  
58 chromatin conformation, chromatin accessibility, and other omics datasets, including single-  
59 cell transcriptomes (22, 23). The resulting data on reprogramming allowed the construction of  
60 various mathematical models (24–26) describing some aspects of reprogramming. However,

61 models that offer specific molecular mechanisms responsible for RIR have been lacking.

62 Here, we describe transcriptomic changes that occur in cells during reprogramming and their  
63 association with mechanisms of aging and longevity. We conducted a comprehensive meta-  
64 analysis of time-course gene expression datasets of mouse and human cells during multi-factor  
65 reprogramming and identified robust transcriptomic signatures associated with this process. By  
66 integrating them with the signatures of aging and lifespan-extending interventions, we revealed  
67 genes and functional processes specifically associated with the rejuvenation and longevity ef-  
68 fects of reprogramming. Using multi-tissue transcriptomic aging clocks developed for humans  
69 and mice, we further observed a significant reduction of the transcriptomic age (tAge) for both  
70 human and mouse cells in response to OSKM, OSK and 7F reprogramming. Remarkably, most  
71 genes responsible for the rejuvenation and longevity effects of reprogramming were not in-  
72 volved in the loss of somatic identity and gain of pluripotency, suggesting that these processes  
73 can be separated. This allowed us to identify specific gene expression signatures of RIR and use  
74 them to discover candidate chemical and genetic interventions that may induce reprogramming-  
75 associated rejuvenation effects without affecting somatic cell identity.

## 76 **Results**

### 77 **Reprogramming gene expression signature captures dynamics towards** 78 **pluripotency**

79 We gathered 41 gene expression datasets of time-course cell reprogramming from 14 studies,  
80 including 29 datasets for mouse cells and 12 datasets for human cells (Suppl. Table S1, Suppl.  
81 Fig. S1). Each dataset represented a continuous cell reprogramming experiment conducted on a  
82 specific cell line with a particular treatment, including OSKM, OSK or 7F. Most murine datasets  
83 were MEF-iPSC reprogramming, whereas human studies used different types of cells. To iden-  
84 tify genes, whose expression was robustly changed during the reprogramming process across



85 the datasets, we utilized mixed-effect linear models previously used to discover transcriptomic  
86 signatures of lifespan-extending interventions and aging (see Methods, Fig. 1A, (27)).

87 Using this approach, we identified mouse- and human-specific gene expression signatures of  
88 reprogramming, as well as common reprogramming signatures conserved across species. In  
89 total, 3087, 7531, and 4807 genes changed their expression in the cells from mice, humans,  
90 and both species, respectively, during reprogramming (BH-adjusted  $p$ -value  $< 0.05$ ). A higher  
91 number of significant genes for humans may be related to batch effects, since all corresponding  
92 time-course datasets have been created by the same research group. Therefore, in this study we  
93 mostly focus on the mouse signature, as it offers more reproducible and robust biomarkers of  
94 cellular reprogramming.

95 To assess the quality of signatures, we checked if they recapitulate gene expression changes in  
96 individual datasets used for their construction (Fig. 1B, Suppl. Fig. S2A). Both murine and  
97 human signatures demonstrated a significant positive Spearman correlation with each utilized  
98 dataset ( $\rho > 0.66$ ). Clusters were generally formed by datasets from the same source (i.e.,  
99 the same GSE ID) and based on the same type of treatment. Thus, classical Yamanaka factors  
100 (YF), including OSKM and OSK treatments, clustered together and were separate from the 7F  
101 intervention (11). In addition, human datasets clustered mainly by tissue type (Suppl. Fig.  
102 S2A). Overall, the correlation analysis suggested that the constructed reprogramming signature  
103 captured consistent gene expression changes observed in multiple independent experiments.

104 To investigate the expression dynamics of top genes associated with reprogramming, we vi-  
105 sualized normalized expression of 5 up- and 5 downregulated genes with the lowest  $p$ -values  
106 (Fig. 1C, Fig. S2B). We observed saturation of gene expression dynamics after 10 days of  
107 reprogramming in mice, while in human cells top genes demonstrated sigmoid-like dynamics  
108 with the saturation point at 20th day. Interestingly, several top up- and downregulated genes

109 captured by our signatures were previously shown to be associated with aging and included  
110 in the GenAge database (28). Thus, *Parp1* is known as an antagonistic pleiotropic gene (29)  
111 regulating genome maintenance and inflammation processes. At the same time, in cooperation  
112 with *Sox2* it can function as an alternative splicing regulator during reprogramming (30). An-  
113 other example is the downregulated *Zmpste24* gene, whose deficiency in mice results in nuclear  
114 architecture abnormalities and signs of accelerated aging (31).

115 For additional validation of our signatures, we examined the distribution of pluripotency-associated  
116 genes (see Table S2 for a full list of pluripotency genes) among those significantly perturbed  
117 during reprogramming (Fig. 1D, Fig. S2C and S2D; see Table S3 for the list of top genes in  
118 the signature). Notably, significantly upregulated genes (BH-adjusted p-value < 0.001) were  
119 enriched by the markers of pluripotency (Fisher exact test p-value <  $1^{-10}$ ). In particular, *Zic3*,  
120 *Gdf3*, *Utf1*, *Tfap2c* were reported to maintain the pluripotency state (32, 33); *Dnmt3l*, *Dnmt3b*  
121 are DNA methylases, while *Tet1* is a demethylation enzyme (32); *Epcam* and *Cdh1* are mes-  
122 enchymal–epithelial transition genes (34). In total, 60% (27 out of 44) pluripotency genes  
123 were significantly upregulated during reprogramming according to the mouse signature. On  
124 the other hand, no markers of pluripotency have been detected across significantly downregu-  
125 lated genes with the exception of 3 genes (*Ccnd1*, *Ccnd2* and *Cdkn1a*) known to be activated  
126 during the early stage of reprogramming and suppressed afterwards (35). Such enrichment of  
127 pluripotency-associated genes within the subset of upregulated, but not downregulated, genes  
128 indicates that our signature correctly characterizes the reprogramming process.

129 Finally, to compare reprogramming-associated gene expression changes across species, we ex-  
130 amined the intersection of statistically significant genes (BH-adjusted p-value < 0.05) from the  
131 mouse and human cell reprogramming signatures (Fig. 1E). Fisher's exact test showed signif-  
132 icant co-regulation of genes during reprogramming in different species (p-value <  $10e^{-10}$ ). In

133 particular, 4 out of the top 5 upregulated mouse genes (*Parp1*, *Rcor2*, *Jarid2*, *Epcam*) were  
134 also significantly upregulated in the human signature. Similarly, 3 out of the top 5 downregu-  
135 lated mouse genes (*Zmpste24*, *Msrb3*, *Tbc1d8b*) were significantly downregulated in the human  
136 signatures. Therefore, although there are certain species-specific reprogramming features (36),  
137 this process appears to be highly similar in human and mouse cells at the level of gene expres-  
138 sion. The obtained signatures allow investigating the interplay between molecular mechanisms  
139 of reprogramming and other traits, including aging and longevity.

## 140 **Reprogramming signatures are associated with biomarkers of longevity** 141 **and aging**

142 To explore the association between reprogramming, aging and longevity, we expanded our  
143 analysis with the gene expression signatures of mammalian aging and established lifespan-  
144 extending interventions identified previously (27). Aging signatures represent age-related gene  
145 expression changes in individual organs (liver, brain, muscle) of mice, rats and humans; com-  
146 mon changes across different tissues within a certain species (mouse, rat, human), and a global  
147 signature characterizing common age-related changes across different tissues and species. Sig-  
148 natures of longevity interventions include biomarkers of individual lifespan-extending interven-  
149 tions (caloric restriction (CR), rapamycin, growth hormone (GH) deficiency), common biomark-  
150 ers of interventions (Common) and genes, whose level of expression is correlated with mouse  
151 median and maximum lifespan (Median; Maximum) (27).

152 We observed significant positive correlations between several signatures of longevity interven-  
153 tions and reprogramming (mean  $\rho = 0.11$ ,  $p_{\text{adjusted}} < 0.05$ ) (Suppl. Fig. S3). At the same  
154 time, aging-related changes demonstrated substantial negative correlation with both reprogram-  
155 ming and lifespan-extending interventions (mean  $\rho = -0.13$ ,  $p_{\text{adjusted}} < 0.05$ ). As expected,  
156 the reprogramming signatures, including human-specific, mouse-specific and the combined sig-

157 nature, clustered together, pointing to the general similarity of this process across species.  
158 Aging and longevity signatures also formed separate clusters. Interestingly, reprogramming-  
159 associated changes clustered together with established lifespan-extending interventions, sug-  
160 gesting that in general reprogramming indeed recapitulates molecular mechanisms of longevity.  
161 Thus, clustering analysis of signatures agreed with the longevity and rejuvenation effects in-  
162 duced by reprogramming (Suppl. Fig. S3).

163 We next aggregated signatures within groups (Reprogramming, Aging, and Interventions) into  
164 combined meta-signatures to measure statistical significance of their co-regulation. There was  
165 a significant enrichment of co-regulated genes associated with reprogramming and longevity  
166 interventions (Fisher's exact test,  $p$ -value = 0.00027, Fig. 2A, left panel), providing addi-  
167 tional evidence of functional coherence of these two processes. Moreover, this co-regulation  
168 was preserved even after removal of all pluripotency genes or epithelial-mesenchymal transi-  
169 tion genes from the analysis (not shown). This suggests that the longevity-associated effect of  
170 reprogramming may be uncoupled from pluripotency or the somatic identity program. Since  
171 reprogramming and aging signatures demonstrated significant negative correlations in our clus-  
172 tering analysis (Suppl. Fig. S3), we did not expect to find an enriched overlap of genes showing  
173 the same direction of expression dynamics between aging and reprogramming. Consistently,  
174 we observed a rather opposite, although not statistically significant, trend (Fisher's exact test,  
175  $p$ -value = 0.21, Fig. 2A, right panel).

176 We examined specific genes responsible for the discovered associations (Fig. 2B). For each  
177 group of signatures (Reprogramming, Aging and Interventions), we selected top genes with  
178 the lowest geometric mean of  $p$ -values. The first gene well-known for its association with  
179 aging and longevity, *Rela*, was downregulated upon reprogramming and in response to longevity  
180 interventions and upregulated during aging. *Rela* is a proto-oncogene, encoding a subunit of

181 NF- $\kappa$ B, and its human ortholog is known to influence age-related inflammation (37). The role  
182 of *Rela* downregulation during reprogramming is coupled with inhibition of NF- $\kappa$ B pathway,  
183 which was reported to block a successful reprogramming in aged and progeria cells (38).

184 *Mrpl11* encoding the 39S subunit component of mitochondrial ribosome showed the opposite  
185 behavior, being positively regulated during reprogramming and by longevity interventions but  
186 downregulated with age. According to the GenAge database (28), deletion of this gene in *S.*  
187 *cerevisiae* decreases lifespan (39), suggesting that its level may affect longevity. However, the  
188 precise mechanistic role of this gene during aging and reprogramming remains unknown.

189 The other interesting example is *Rragc*, which has positive expression dynamics in the case  
190 of interventions and aging, but is downregulated during reprogramming. *Rragc* participates  
191 in the relocalization of mTORC1 to the lysosomes and its subsequent activation by the GTPase  
192 Rheb (40,41). *Rragc* upregulation in longevity interventions and in the aging liver signature can  
193 be explained by the duality of Rag-GATOR pathway mechanism (42), depending on the source  
194 of amino acids. Downregulation of *Rragc* during reprogramming may be associated with tran-  
195 sient mTOR pathway suppression influencing autophagy process (43). Interestingly, although  
196 expression of the gene coding for Insulin Like Growth Factor 1 (*Igf1*) was downregulated by  
197 the established longevity interventions, it wasn't significantly perturbed during reprogramming.

198 Of particular interest are the genes showing the same direction of expression in all three sig-  
199 nature groups: e.g. upregulated *Trappc6a* (encoding a trafficking protein particle complex that  
200 tethers transport vesicles to the *cis*-Golgi membrane) (44). Surprisingly, we found one gene,  
201 *Uqcrcq*, with negative dynamics in aging and reprogramming, and positive in longevity inter-  
202 ventions (Fig. 2B). This gene encodes a subunit of ubiquinol-cytochrome C reductase complex  
203 III, which is part of the mitochondrial respiratory chain (44).

## 204 **Functional enrichment analysis reveals processes associated with** 205 **reprogramming-induced rejuvenation**

206 To reveal functional processes associated with reprogramming, aging and longevity, we con-  
207 ducted gene set enrichment analysis (GSEA) of identified signatures (45). Similar to the indi-  
208 vidual meta-slopes (Suppl. Fig. S3), functional changes induced by reprogramming and estab-  
209 lished lifespan-extending interventions generally demonstrated a significant positive correlation  
210 with each other (mean  $\rho = 0.23$ , adjusted p-value  $< 0.05$ ) and were negatively associated with  
211 age-related changes (mean  $\rho = -0.22$ , adj. p-value  $< 0.05$ ) (Fig. 2C). Remarkably, normalized  
212 enrichment scores of functions were correlated even stronger than meta-slopes of individual  
213 genes.

214 Certain functional terms well characterized the identified reprogramming signature (Fig. 2D).  
215 For example, we observed downregulation of genes related to the Epithelial mesenchymal tran-  
216 sition (EMT), the process which was shown to be suppressed during reprogramming (23, 46).  
217 Among the pathways downregulated by reprogramming but upregulated with age, we observed  
218 several terms related to inflammation: Inflammatory response, IL6/JAK/STAT3 signaling path-  
219 way, TNF $\alpha$  signaling via NF $\kappa$ B (adjusted geometric mean p-value  $< 0.007$  for each term and  
220 signature group). On the other hand, terms corresponding to mitochondrial function (Mitochon-  
221 drial translation, ATP metabolic process) were upregulated in response to lifespan-extending  
222 interventions and reprogramming but downregulated with age (adjusted p-value  $< 0.03$  for each  
223 term and signature group). This analysis pointed to the specific cellular processes associated  
224 with the longevity and rejuvenation effects of reprogramming. However, reprogramming did not  
225 appear to be a typical longevity intervention. In particular, it did not induce upregulation of the  
226 p53 pathway (adjusted p-value = 0.004), one of the common biomarkers of lifespan-extending  
227 interventions. Besides, it was also associated with downregulation of certain pathways upreg-  
228 ulated by longevity interventions (27), including Heme metabolism, Hypoxia and Apoptosis

229 (adjusted p-value < 0.008 for each term in reprogramming group).

## 230 **Clustering analysis of gene expression dynamics during reprogramming** 231 **reveals specific trajectories of longevity-associated genes**

232 To investigate specific dynamics of expression of longevity-associated genes during reprogram-  
233 ming, we performed a clustering analysis. First, we aggregated time series datasets of iPSC  
234 generation in mouse cells and calculated average trajectory for each gene significantly per-  
235 turbed during reprogramming (see Methods). Next, we clustered genes by their trajectory using  
236 an agglomerative clustering approach. This approach resulted in 4 gene clusters selected using  
237 the Elbow criterion (Fig. 4A,B). Two major clusters (2 and 3) included genes that were almost  
238 monotonously up- or downregulated with time, respectively. Consistent with the data in Figure  
239 1C, their expression followed a hyperbolic trajectory with a characteristic saturation at approx-  
240 imately 10th day of reprogramming. The expression of genes from two other clusters (1 and  
241 4) followed U-shaped curve, starting from a transient up- or downregulation, respectively, and  
242 gradually returning back to the initial expression value afterwards. These genes reached their  
243 peak expression value after approximately 4-6 days of reprogramming.

244 Then, each of the clusters was assessed for enrichment of longevity- and aging-associated genes  
245 obtained from the previously described signatures using Fisher exact test (Fig. 4C). Upregu-  
246 lated and downregulated signature genes were analyzed separately. The most significant asso-  
247 ciation was observed between clusters 2-3 and signatures of longevity interventions, including  
248 biomarkers of CR and GH deficiency as well as genes associated with murine median and max-  
249 imum lifespan signatures (adjusted p-value < 0.05). Remarkably, genes from both of these  
250 clusters were regulated by longevity interventions in the same direction. Thus, genes up- and  
251 downregulated during reprogramming (clusters 2 and 3) were enriched for genes up- and down-  
252 regulated in response to lifespan-extending interventions, respectively. Functional enrichment

253 analysis of the clusters revealed that genes in 2 clusters upregulated during reprogramming in-  
254 cluded replication activating E2F target genes as well as genes involved in base excision repair  
255 and G2-M checkpoint (adjusted p-value < 0.0032). Cluster 3, downregulated during repro-  
256 gramming, was enriched with genes related to EMT, Inflammatory response and Myogenesis  
257 (adjusted p-value < 0.001). Genes in clusters 1 and 4 were associated with several signatures  
258 including CR (co-regulation with 1) and aging in brain and in rats (opposite regulation with 1  
259 and 4). Cluster 1 following U-shape behavior was enriched for genes involved in the TNF-alpha  
260 signaling pathway, Hypoxia, Protein secretion and Myogenesis (adjusted p-value < 0.003). Fi-  
261 nally, cluster 4 demonstrating the opposite dynamics was functionally associated with G2-M  
262 Checkpoint, E2F targets, Myc targets, and mitochondrial translation (adjusted p-value < 0.003).

263 Thus, our cluster analysis of murine cell reprogramming suggests that genes monotonously  
264 changed during reprogramming show a significant co-regulated association with the biomarkers  
265 of lifespan extension. Interestingly, these genes were mostly perturbed during the first 6 days of  
266 reprogramming, suggesting that even transiently reprogrammed cells may acquire a longevity-  
267 associated transcriptomic phenotype, consistent with the experiments in vivo (15, 16).

## 268 **Transcriptomic clock reveals the rejuvenation effect of reprogramming**

269 To estimate the systemic rejuvenation occurring during reprogramming, we utilized our recently  
270 developed mouse and human multi-tissue gene expression aging clocks (unpublished). These  
271 transcriptomic clocks (tClocks) were constructed based on more than 2,000 samples from 94  
272 datasets across multiple tissues of mouse and human. We applied the clocks to predict the  
273 change of transcriptomic age (tAge) during reprogramming of mouse (Fig. 3A, B) and human  
274 cells (Fig. 3C). We also compared tClocks predictions with with epigenetic ages estimated using  
275 Horvath clock ( (21)) utilizing the dataset with both DNA methylation and gene expression  
276 measured at once (47). We observed a significant positive correlation between the predictions



277 (Suppl. Fig. S5), showing consistent behavior of clocks developed using different types of  
278 molecular data.

279 We found significant transcriptomic rejuvenation of murine cells during reprogramming in-  
280 duced by YF (Fig. 3A). Different variants of YF treatment, including OSKM and OSK, resulted  
281 in a significant decrease of tAge during reprogramming (p-value < 0.05), with the exception of  
282 OK+9MS (48) treatment and OSKM accompanied by *Mbd3f* knockout (49) (Suppl. Fig. S4A).  
283 Treatment of cells with the full set of 7 reprogramming factors also led to a decrease in tAge  
284 (p-value = 1.43e-05) (Fig. 3C, Fig. S4A). At the same time, one-by-one removal from the cock-  
285 tail of these factors displayed diverse behavior. Specifically, removals of *Esrrb*, *Nanog*, *Mkk6*,  
286 *Kdm2b* (also known as *Jhdm1b*), *Jdp2* did not diminish the RIR effect, whereas removals of  
287 *Glis* and especially *Sall4* blocked the rejuvenation process. Interestingly, removal of *Sall4* at  
288 the same time resulted in a dramatic decrease in reprogramming efficiency (11). On the other  
289 hand, removal of *Esrrb* also led to a significant decrease in reprogramming efficiency but did  
290 not impair rejuvenation according to the transcriptomic clock, suggesting that the rejuvenation  
291 effect can be at least partly decoupled from the pluripotency state induction. Remarkably, the  
292 final tAge of reprogrammed cells subjected to YF and 7F was close to 0 for most datasets (av-  
293 erage tAge = -0.0087 on day 19), which is consistent with the epigenetic data (19). It suggests  
294 that features of aging are reset during reprogramming both at the gene expression and DNA  
295 methylation levels.

296 To explore specific genes, whose expression change resulted in RIR, we measured the change in  
297 tAge after removing each individual gene from the mouse tClock model (see Methods), further  
298 referred to as a rejuvenation effect (RE) of a gene. We calculated RE for all genes with non-zero  
299 coefficients in the model (337 genes in total) across all datasets where significant rejuvenation  
300 was observed (adjusted p-value < 0.05). We identified 84 genes with the positive and significant

301 (adjusted p-value < 0.05) rejuvenation effect. Enrichment analysis of this set of genes indicated  
302 a strong relation to Epithelial-Mesenchymal Transition (EMT) and processes involved in Ex-  
303 tracellular matrix organization, including Collagen formation, Integrin cell surface interaction,  
304 and others (adjusted p-value < 0.05 for all presented terms) (Fig. 3E).

305 Next, we searched for genes contributing primarily to rejuvenation according to the mouse  
306 tClock model. Surprisingly, only one pluripotency-associated gene - *Ezh2* - was found among  
307 the top 10 predictors of RIR (Fig. 3F). However, Polycomb-group gene *Ezh2* (50) contributed  
308 19% of the total rejuvenation effect on average across datasets (adjusted p-value=0.0004). Other  
309 genes in the top 10 were associated mostly with EMT (i.e., *Col3a1*, *Igfbp4*, *Postn*, *Fnl1*). We  
310 further assessed the RE after removing all genes related to EMT or pluripotency from the  
311 model (Fig. 3G). We observed a significant reduction of the rejuvenation effect by 37% on  
312 average after removing EMT genes (p-value = 1.193e-05) and 35% on average after removing  
313 pluripotency-associated genes (p-value = 1.18e-04). It's worth noting that EMT and pluripo-  
314 tency gene sets have no common genes. These results provide an estimate of the impact of  
315 pluripotency and EMT related genes on reprogramming-induced rejuvenation, suggesting that  
316 the major part of RIR is not explained by the perturbed expression of genes associated with  
317 somatic identity.

318 An analogous analysis of human cell reprogramming following OSKM treatment produced sim-  
319 ilar results (Fig. 3C). Using a human multi-tissue tClock, we observed a significant rejuvenation  
320 (adjusted p-value < 0.05) in almost all cell lines during reprogramming. The only exception was  
321 a dataset on foreskin fibroblasts containing very few data points. Interestingly, the rejuvenation  
322 effect of individual genes demonstrated high variance across human cell lines (data not shown),  
323 suggesting that the rejuvenation process during reprogramming may be achieved through regu-  
324 lation of various genes depending on the tissue. Consistently, human rejuvenating genes were

325 not significantly enriched in any functional terms, supporting high heterogeneity of RIR across  
326 tissues.

327 To compare the rejuvenating trajectories of human and mouse cells subjected to OSKM treat-  
328 ment, we aggregated normalized tAge values across the datasets for each species and applied a  
329 moving average smoothing approach (Fig. 3D). We observed a rapid decrease of transcriptomic  
330 age of murine cells following the shape of exponential decay. On the other hand, rejuvena-  
331 tion of human cells followed a sigmoid curve. Although the transcriptomic age of cells from  
332 both species was close to zero at the end of reprogramming, the RIR of human cells required  
333 more time. Remarkably, this time difference was consistent with the duration of the repro-  
334 gramming process, lasting, on average, for 14 and 30 days for mouse and human cell lines,  
335 respectively (36).

### 336 **Reprogramming signature uncovers new geroprotective interventions**

337 To identify treatments that induce reprogramming-associated rejuvenation at the gene expres-  
338 sion level, we selected genes displaying contrasting expression patterns according to aging and  
339 reprogramming signatures (Fig. 2A, right panel). We then used these genes as a query for the  
340 Connectivity MAP (CMAP) database (51) (see Methods). CMAP database contains gene ex-  
341 pression profiles of human cells treated with different genetic or chemical interventions. CMAP  
342 connectivity analysis provides connectivity scores as a measure of similarity between a given  
343 gene set and transcription changes induced by perturbations from the database.

344 We selected top 20 perturbations showing the most significant positive or negative association  
345 with the reprogramming-associated rejuvenation signature for each type of perturbation: over-  
346 expression of a particular gene, treatment with a particular compound, knockdown of a gene via  
347 shRNA, and knockout of a gene via CRISPR-Cas9 system. To validate the rejuvenation effect  
348 of identified interventions, we applied the human and mouse aging tClocks to gene expression

349 profiles of untreated and treated samples from the CMAP database separately for each available  
350 cell line. We then aggregated the obtained tAge values across cell lines using linear regression  
351 models (see Methods). In the end, we obtained two estimates of rejuvenation effects for each  
352 treatment, including aggregated connectivity scores from the CMAP analysis and aggregated  
353 tAge values from aging clocks (Fig. 5A).

354 Among interventions that demonstrate significant rejuvenation effects based on the connectiv-  
355 ity score as well as both mouse and human tClocks we observed overexpression of *HAVCR2*  
356 (*TIM3*), which encodes a cell surface receptor implicated in modulating innate and adaptive im-  
357 mune response (adjusted p-value = 0.028). Interestingly, overexpression of *TIM3* was shown to  
358 alleviate inflammation in human patients with thyroid-associated ophthalmopathy via suppress-  
359 ing the Akt/NF- $\kappa$ B signaling pathway (52). At the same time, *Tim3* overexpression resulted in  
360 deterioration of neuroinflammatory and neurocyte apoptosis in a rat subarachnoid hemorrhage  
361 model (53). Together, these observations suggest that *TIM3* plays a significant role in regula-  
362 tion of age-associated inflammatory processes, and its overexpression can be considered as a  
363 treatment against inflammaging.

364 Knockdown of *ERRF1* (*MIG-6*) was also found to decrease the cellular transcriptomic age ac-  
365 cording to both our clocks (adjusted p-value = 1.24e-8). Expression of *ERRF1*, which encodes  
366 a negative regulator of EGFR signaling, is upregulated during the cell growth (54). Interest-  
367 ingly, overexpression of *MIG-6* was shown to be sufficient to trigger premature cellular senes-  
368 cence (55). In contrast, knockdown of *MIG-6* delayed the initiation of Ras-induced cellular  
369 senescence (56), supporting our conclusion derived from tClock.

370 Among top interventions inducing a significant rejuvenation effect across different cell lines  
371 according to the human clock, we identified knockdown of *PRKCE* (adj. p-value = 1.7e-5),  
372 knockout of *C6ORF223* (adj. p-value = 1.9e-4) as well as a treatment with a chemical com-

373 pound osthoh applied at 10  $\mu$ M dose for 6 hours (adj. p-value = 0.0038). Interestingly, osthoh has  
374 been shown to demonstrate anti-inflammatory effects by blocking the activation of NF- $\kappa$ B and  
375 MAPK/p38 pathways (57). In addition, *osthol* prevents accumulation of advanced glycation end  
376 products (AGE) via the induction of *Klotho* expression (58). The rejuvenation effect of *PRKCE*  
377 knockdown and *C6ORF223* knockout was also supported by experimental data. Thus, inhibi-  
378 tion of *PKC* signaling was shown to maintain self-renewal and pluripotency of rat embryonic  
379 stem cells (59), while *C6ORF223* accumulation was associated with age-related macular de-  
380 generation (60) and was correlated in expression levels with a well-known human aging-related  
381 gene *VEGF* (61, 62). Remarkably, one of the top interventions predicted by our model was over-  
382 expression of *ATG5* showing a strong rejuvenation effect by human clocks (adjusted p-value =  
383 1.75e-12). *ATG5* gene product is involved in autophagy, mitochondrial quality control, regula-  
384 tion of the innate immune response and other cell processes. In fact, *ATG5* overexpression was  
385 shown to increase lifespan of healthy mice by enhancing autophagy (63).

386 Finally, to investigate whether the treatments described above induce expression of pluripotency-  
387 associated genes, we performed GSEA analysis testing if genes differentially expressed in re-  
388 sponse to interventions are enriched for pluripotency genes from (64) (see Methods). After  
389 obtaining NES scores for each cell line, we aggregated them using average and applied t-test  
390 to assess significance of the aggregated score. As a positive control, we performed a similar  
391 analysis in 2 models of overexpression of *MYC*, known to partially induce the pluripotency  
392 program in cells (9, 22). The latter treatment showed a significant upregulation of pluripotency  
393 genes (p-value < 8.94e-5), while it did not result in a significant reduction of cellular tAge. On  
394 the other hand, *ATG5* overexpression induced a rejuvenation effect according to tClock with-  
395 out activation of pluripotency genes. In fact, it even slightly suppressed pluripotency program,  
396 though insignificantly (p-value = 0.083). Similar significant rejuvenation combined with neu-  
397 tral effect on pluripotency (p-value = 0.128) was produced by knockout of lncRNA *C6ORF223*.

398 These examples confirm that rejuvenation and loss of somatic identity associated with repro-  
399 gramming can be decoupled, and interventions separately affecting each of these processes may  
400 be developed.

## 401 Discussion

402 Reprogramming-induced rejuvenation is a fundamental concept denoting a family of cell repro-  
403 gramming approaches focused on their capacity for rejuvenation (65). These approaches gained  
404 much attention in recent years as they have the potential for radical interference into aging and  
405 longevity (2–7). Therefore, it is essential to understand precisely which processes during re-  
406 programming lead to rejuvenation and how they can be decoupled from the loss of somatic  
407 identity. In this study, we investigated these processes and provided a systemic view on reju-  
408 venation during reprogramming by analyzing signatures identified from multiple time-course  
409 reprogramming datasets and revealing their interplay with biomarkers of aging and lifespan  
410 extension (Fig. 6A).

411 We were able to construct robust reprogramming signatures and show that: (i) mouse and human  
412 signatures are well correlated with each other and share a significant number of genes regulated  
413 in the same direction (Fig. 1E); and (ii) reprogramming signatures are positively correlated with  
414 longevity interventions and negatively correlated with various aging signatures. In addition,  
415 we discovered co-regulation of particular genes in response to reprogramming and established  
416 lifespan-extending interventions including downregulation of *Rela* and upregulation of *Mrpl11*  
417 previously shown to be significant biomarkers of murine longevity (28,37,38). The associations  
418 between three groups of signatures - reprogramming, interventions, and aging - persist and are  
419 even amplified at the level of functional enrichment (Fig. 2C, 6B). Most conspicuous functions  
420 (Fig. 6C) demonstrate that reprogramming may act as a longevity intervention but not in all

421 aspects. Of note, these results are generally consistent with those obtained from single-cell  
422 analysis (22). Namely, we observed that the reprogramming suppressed genes were associ-  
423 ated with inflammatory response. On the other hand, upregulation of fatty acid metabolism  
424 observed after transient reprogramming of mouse mesenchymal stem cells was not prominent  
425 in our signatures. Multiple studies have previously demonstrated that the DNA methylation  
426 age (mAge) decreases during the reprogramming process (15, 18, 19, 66). However, only a few  
427 studies (20) attempted to reproduce these results at the transcriptome level using single-tissue  
428 clocks (see (67) for details). To fill this gap, we utilized mouse and human clocks trained on  
429 multiple tissues to predict transcriptomic age (tAge) of cells during the whole reprogramming  
430 process (Fig. 6D). As expected, we observed a systematic decrease of tAge for the majority of  
431 reprogramming datasets for both mouse and human cell lines (Fig. 6E, 3C,D). Notably, some  
432 treatments that failed to result in successful reprogramming during the original experiment (e.g.  
433 7F-Sall4, (11)), did not lead to the decrease of tAge with time. On the other hand, some of  
434 the treatments that didn't lead to the gain of pluripotency significantly decreased transcriptomic  
435 age of somatic cells (e.g. 7F-Esrrb, (11)). This is consistent with results of (22) reporting  
436 that induction of only SK factors decreases aging score without loss of mesenchymal identity.  
437 Such results support the possibility of decoupling reprogramming-induced rejuvenation from  
438 the changes involved in the loss of somatic identity.

439 Next, we explored genes responsible for RIR by conducting *in silico* knockout experiments.  
440 We identified several genes that contributed the most to the rejuvenation process. Among the  
441 top 10 genes, there was only one pluripotency-associated gene - *Ezh2* (Fig. 3F). We also ob-  
442 served several genes associated with EMT, e.g., *Col3a1*, *Igfbp4*, *Postn*, *Fn1*. In total, 37% of  
443 RIR, on average, was explained by the EMT genes, and 35% of the RIR was affected by the  
444 pluripotency-associated genes. Therefore, the tClock model suggests that although a part of  
445 the RIR is achieved through the deregulation of genes involved in the maintenance of somatic

446 identity, a significant portion of it is orthogonal to this process. Genes responsible for that effect  
447 represent perspective biomarkers allowing to search for new geroprotectors.

448 To discover such interventions, we conducted CMAP (51) connectivity analysis and revealed  
449 treatments that produced rejuvenation-associated gene expression changes similar to repro-  
450 gramming. We validated our hits using human transcriptomic clocks and revealed several in-  
451 terventions with a potential rejuvenation effect. Consistently, some of them, including *ATG5*  
452 overexpression, *C6ORF223* knockout and osthon treatment, have been previously shown to have  
453 a positive effect on lifespan (57, 58, 60, 63). In addition, we tested these and other rejuvenating  
454 interventions *in silico* for their ability to induce pluripotency program (5C) and observed that  
455 *ATG5* overexpression and *C6ORF223* knockout did not significantly affect the expression of  
456 these genes across multiple cell lines (Fig. 5H). Therefore, according to our data, these treat-  
457 ments appear to produce RIR without affecting somatic cell identity. Interestingly, *MYC* over-  
458 expression demonstrated the opposite effect, producing no significant rejuvenation effect but  
459 inducing the pluripotency program, in agreement with its role as one of Yamanaka's factors but  
460 interfering with results of (22) where induction of this factor showed little loss of mesenchymal  
461 identity but also small decrease in aging score.

462 Taken together, these results indicate that the reprogramming process contains a rejuvenation  
463 component that can be expressed in the gene or function dynamics. Recent *in vivo* reprogram-  
464 ming demonstrated no systemic rejuvenation of all murine tissues with the exception of skin  
465 and kidney tissues (18). The authors hypothesize that this is due to some tissues being more  
466 susceptible to OSKM reprogramming than others. It can even be assumed that the OSKM set  
467 of factors may not be suitable for *in vivo* reprogramming. Moreover, the fact that this set of  
468 factors is known to be oncogenic forces researchers to develop complex treatment protocols.  
469 This complexity can be avoided if the oncogenic aspect is completely excluded, which is pro-



470 posed in the RIR concept. Today, several of the possible ways to solve this problem include the  
471 use of OSK reprogramming (15), reprogramming until the maturation phase achieved (20) or  
472 even chemical reprogramming (12). However, understanding the mechanisms of rejuvenation  
473 achieved during reprogramming may provide us with better solutions. Future rigorous studies  
474 should reveal which gene networks are responsible for the regulation of the RIR process. Anal-  
475 ysis of epigenetic aspects of RIR, such as methylation or histone modifications accompanying  
476 expression dynamics, may be a future direction. The ultimate solution would be to construct  
477 a dynamic mathematical model of RIR to predict not only a subset of transcription factors (or  
478 small molecule compounds) but also other characteristics necessary for successful treatment.

479 We propose a geometric metaphor to better represent the essence of rejuvenation during cell  
480 reprogramming (Fig. 6G). We represent the reprogramming process as a vector  $\bar{R}$  in the space  
481 of transcriptomic signatures. We assume that this vector can be decomposed into two non-  
482 orthogonal components: rejuvenation  $\bar{r}$  and pluripotency  $\bar{p}$  (here we mean the cumulative sig-  
483 nature towards pluripotency). Their sum gives the original reprogramming vector  $\bar{R} = \bar{r} + \bar{p}$ .  
484 It follows from our analysis that pluripotency may proceed without rejuvenation (Suppl. Fig.  
485 3A), and rejuvenation can occur without successfully achieved pluripotency (exemplified by  
486 the 7F-*Essrb* treatment Fig. 3B). It means that rejuvenation and pluripotency have co-directed  
487 components (projections onto the reprogramming vector) and also have orthogonal components  
488 (e.g., projection of rejuvenation vector onto the axis orthogonal to pluripotency). We argue that  
489 for successful rejuvenation without the risk of pluripotency-induced tumorigenesis, we need to  
490 identify the signature of "pure rejuvenation"  $\bar{r} \perp \bar{p}$ , i.e., a set of genes with corresponding levels  
491 of expression that causes cell rejuvenation without notable shift towards pluripotency. The re-  
492 sults obtained in this study using transcriptomic clock suggest that such genes include *Col3a1*,  
493 *Fnl1*, *Cd24a*, while *Ezh2* is an example of a gene contributing to rejuvenation but being also  
494 a marker of pluripotency. Using a multitool of transcriptomic signature analysis, we made a

495 step towards decomposing rejuvenation and pluripotency vectors that may lead to the safe and  
496 efficient reprogramming-induced rejuvenation.

## 497 **Methods**

### 498 **Data collection**

499 We collected publicly available cell reprogramming datasets containing more than three time  
500 points across the reprogramming process (Table S1). ESC and iPSC states were excluded since  
501 they were not corresponding to any particular time point of reprogramming. We used only  
502 preprocessed data (e.g., read counts) provided in the GEO database by datasets' contributors.

### 503 **Data preprocessing**

504 To aggregate multiple datasets into a joint signature, we utilized an approach as in our earlier  
505 work (27). It consists of several steps (Fig. 1A). First, each dataset was normalized using a  
506 conventional normalization technique appropriate for the given data type. RLE normalization  
507 followed by log transformation was applied for RNA-seq data. Log transformation of intensi-  
508 ties followed by scaling and quantile normalization was used for microarray data. Second, for  
509 each gene changing its expression value with time, a linear regression model was constructed  
510 using the *limma* package (68). Third, slope coefficients, their standard errors and related statis-  
511 tics were extracted from models and used to represent corresponding gene regulation (positive  
512 or negative). Thus, a positive or negative slope corresponds to an increasing or decreasing  
513 expression of a particular gene with time in a given dataset, respectively. Finally, slope val-  
514 ues from different datasets were aggregated using the mixed-effects model constructed by the  
515 *metafor* package (69), with GEO ID introduced as a random term. For every gene, this model  
516 produced a meta-slope, being a weighted average of slopes across all analyzed datasets. Cor-  
517 responding p-values were adjusted for multiple comparisons using Benjamini-Hochberg (BH)

518 approach (70). Genes with adjusted p-value  $< 0.05$  were considered significant and included in  
519 the final reprogramming signature.

## 520 **Selection of datasets for the aggregated signature**

521 The critical step for constructing a correct aggregated signature is filtering out non-concordant  
522 datasets. We used the Spearman correlation of dataset slopes as a concordance measure and  
523 calculated pairwise correlation coefficients between all 29 mouse and 12 human datasets using  
524 the union of top 350 genes in each dataset ranked by the correlation p-value of slopes. The  
525 threshold of 350 genes was identified to be optimal for noise removal since it maximized the  
526 number of significant pairwise correlations (Benjamini-Hochberg adjusted p-value  $< 0.05$  and  
527 absolute  $\rho > 0.1$ ). Finally, we used the agglomerative clustering approach based on the Eu-  
528 clidean distance with complete linkage to extract the largest cluster among all 29 mouse and 12  
529 human datasets (Suppl. Fig. S1). As a result, 19 out of 29 mouse datasets and 11 out of 12  
530 human datasets passed the selection criteria (formed a dominant cluster, see also supplementary  
531 figure S1 and Methods).

## 532 **Signature construction**

533 Prior to signature construction, we normalized slope coefficients from different datasets based  
534 on the following algorithm. First, Spearman correlation of reprogramming-related gene ex-  
535 pression changes was calculated for each pair of datasets. For that, we obtained the top 350  
536 statistically significant reprogramming-associated genes ranked by the correlation p-values in  
537 each dataset and then formed a union of two such gene lists within a pair of datasets. Then,  
538 multiple Deming regression was calculated simultaneously for each pair of datasets with sig-  
539 nificant correlations using the union of top 350 genes. During this step, the cumulative squared  
540 loss across all significantly correlated pairs of datasets within a certain signature was minimized

541 using the L-BFGS-B method in the R function *optim*. Normalization coefficients were allowed  
542 to vary between 0.01 and 100. To establish the global minimum of the error function, multiple  
543 Deming regression was calculated 10 times with random initial sets of normalization coeffi-  
544 cients, and final coefficients were chosen from the run with the smallest cumulative regression  
545 error. Among these 10 runs, the error minimum was the same for most runs, indicating that the  
546 global minimum was achieved for each signature.

547 Then we used the *rma.mv* function in the *metafor* package (69) to construct intercept-only  
548 multilevel mixed-effects model with nested random effects (71). As a response variable, we  
549 used Deming-normalized slopes derived for each dataset. Since datasets originated from diverse  
550 sources, we had to account for their heterogeneity across different experiments (i.e., different  
551 GSE IDs) and within the same experiment (i.e., the same GSE ID), implying the multilevel  
552 embedded structure of the model. Fixed effects were not considered within this model. The  
553 final model can be described with the following formula:

$$\hat{s}_{ij} = \mu + \zeta_{(inGSE)ij} + \zeta_{(bwGSE)j} + \epsilon_{ij} \quad (1)$$

554 where  $\hat{s}_{ij}$  is an estimate of the true effect size  $s_{ij}$ ;  $\mu$  is an actual mean of the slopes' distribution;  
555 term  $ij$  denotes that some effect size  $i$  is nested in cluster  $j$ ;  $\zeta_{(inGSE)ij}$  is random term cor-  
556 responding to a within-GSE-ID heterogeneity;  $\zeta_{(bwGSE)j}$  is a random term corresponding to a  
557 between-GSE-ID heterogeneity;  $\epsilon_{ij}$  is a sampling error of individual datasets, which can be es-  
558 timated from a standard error of a corresponding slope. We applied this model for construction  
559 of mouse, human, and combined signatures. Following the principle mentioned in the previous  
560 paragraph, we selected 19 datasets for mouse signature, 11 datasets for human signature, and  
561 30 datasets (19 mouse + 11 human datasets) for the combined signature.

## 562 **Aggregation of p-values across the signatures**

563 The aggregation of p-values within each group of signatures was conducted using the harmonic  
564 mean (72). Subsequently, we adjusted aggregated p-values using BH method. We selected  
565 significant genes (adjusted p-values  $< 0.05$ ) to investigate the overlap of genes between repro-  
566 gramming signature and signatures of aging and lifespan-extending interventions. The statisti-  
567 cal significance of the overlap was assessed with Fisher's exact test.

## 568 **Clustering analysis**

569 To cluster genes by their expression dynamics, we first scaled all gene expression values, trans-  
570 forming them into z-scores. Next, we grouped observations into 2-day periods and applied  
571 one-way ANOVA considering 2-day intervals as a factor variable, testing a null hypothesis  
572 that average expression is equal over all intervals. Genes with the BH adjusted p-value  $< 0.05$   
573 were considered to demonstrate significant expression change over time. We excluded genes  
574 with constant expression and clustered the remaining genes using agglomerative approach with  
575 correlation distance metric and complete linkage, considering time intervals as features. The  
576 scikit-learn Python package (73) was used for this analysis.

## 577 **Prediction of transcriptomic age**

578 To investigate the dynamics of gene expression biomarkers of aging during cellular reprogram-  
579 ming, we utilized multi-tissue transcriptomic mouse and human clocks based on signatures of  
580 aging across different tissues identified as explained in (27). The applied clocks were based  
581 on elastic net linear models that were designed to predict relative chronological age calcu-  
582 lated as a real age divided by the maximum lifespan for a given species (48 months and 122  
583 years for mouse and human, respectively). The missing values were omitted with the precal-  
584 culated average values from the clock. Using the mouse and human clocks, we then calculated

585 the transcriptomic age (tAge) for each mouse and human sample, respectively. Change of the  
586 tAge with time during reprogramming within each dataset was assessed using linear regression  
587 model. The slope of the tAge change with time was considered significant if the corresponding  
588 BH adjusted p-value < 0.05. For normalization of the tAge values across several OSKM-based  
589 reprogramming datasets, relative tAge values were divided by the average tAge value of the first  
590 time point within each dataset. After that, aggregated tAge trajectories for human and mouse  
591 data were smoothed using 3-day period moving average. Standard errors were calculated for  
592 smoothed tAge values in each time point.

### 593 **Estimation of rejuvenation effect of a gene**

594 To estimate the rejuvenation effect of a specific gene in a particular dataset, the following  
595 pipeline was carried out: 1) *in silico* knockout was performed by making the expression of  
596 this gene equal to 0 for all of the samples; 2) tClock was used to calculate tAge for all samples  
597 in the given dataset before and after the "knockout"; 3) linear model was fitted to predict time-  
598 dependent tAge trajectory before and after "knockouts"; 4) the maximum difference between  
599 tAge estimates obtained from the linear model before and after "knockouts" was calculated;  
600 5) the difference was normalized to the total rejuvenation effect in the dataset (the difference  
601 between the tAge value at the first time point and the tAge value at the final day of reprogram-  
602 ming). Thus, the result of this procedure demonstrates how the removal of certain gene affects  
603 the magnitude of tAge decrease during reprogramming, corresponding to its rejuvenating effect.  
604 The same approach was used to calculate the rejuvenation effect after "knocking out" the whole  
605 gene set (e.g., EMT or pluripotency-associated genes).

## 606 **Aggregated analysis of rejuvenation-inducing interventions based on CMAP**

607 To identify treatments mimicking RIR at the gene expression level, we used CMAP query API  
608 (51). As a query, genes upregulated in combined reprogramming signature but downregulated in  
609 combined aging signature ('Up' subset), and genes downregulated in combined reprogramming  
610 signature but upregulated in combined aging signature ('Down' subset) were used. We will  
611 refer to these gene subsets as the RIR gene set.

612 The result of a CMAP query is essentially a list of perturbagens ordered by the score of as-  
613 sociation between differentially-expressed gene set and the query gene set. A positive score  
614 indicates a similarity between the query and effect of the given perturbagen applied to the cer-  
615 tain cellular line, while a negative score indicates that these two signatures are the opposite to  
616 each other (i.e., genes that are increased by treatment with the perturbagen are decreased in the  
617 query, and vice versa). The magnitude of the score corresponds to the magnitude of similar-  
618 ity or dissimilarity between the treatment and query. Therefore, top and bottom hits in these  
619 lists represent interventions that have the strongest positive and negative associations with the  
620 query, respectively. These treatments appear to be of the highest interest for the subsequent  
621 investigation.

622 At the next step, we aggregated connectivity scores for each intervention with the same dosage  
623 and treatment time across different cell lines using simple averaging of connectivity scores. The  
624 statistical significance of the positive or negative association of the intervention across cell lines  
625 was assessed using t-test with the null hypothesis that the mean of connectivity scores across  
626 cell types is equal to zero. We then selected the top 20 positive and top 20 negative aggregated  
627 interventions from each of four intervention types (gene overexpression, chemical compound  
628 treatment, gene knockdown with shRNA, and gene knockout with CRISPR) for further analysis.

629 We downloaded gene expression data for the selected interventions and further applied tran-

630 scriptomic clocks to the gene expression profiles induced by these treatments as well as control  
631 samples. Specifically, we obtained quantile normalized data from the CMAP level 3 data pre-  
632 processing step. We downloaded treatment data and corresponding control data for a given  
633 unique intervention-dosage-duration group indicator. After an additional data normalization  
634 procedure (see "Prediction of transcriptomic age" section for details), we applied the mouse  
635 and human transcriptomic clocks to the gene expression vectors. The obtained relative age  
636 values were aggregated with a linear model of the following form:

$$Age \sim Cell\ Line + Treatment, \quad (2)$$

637 where *Age* is the relative tAge value, *Cell Line* is the name of corresponding cell line from  
638 CMAP (factor variable), and *Treatment* is the binary variable, which indicates whether the  
639 given relative tAge value is from the control or treatment subset. We fitted this model using  
640 *statsmodels* python package (74). The resulting coefficient of the *Treatment* variable can be  
641 interpreted as an average change in the relative tAge in response to a given intervention across  
642 cell lines, while its p-value reflects the statistical significance of this change. Thus, negative  
643 *Treatment* coefficient corresponds to "rejuvenation" effect while positive reflects "aging" ef-  
644 fect. We paid particular attention to interventions with negative significant coefficient of the  
645 treatment variable coupled with the positive aggregated connectivity scores. Such interventions  
646 result in the gene expression response similar to reprogramming and opposite to aging and,  
647 at the same time, contribute to rejuvenation according to the transcriptomic clock, being of a  
648 particular interest.

649 Among the identified interventions, we searched for those not inducing the expression of pluripotency-  
650 related genes. First, we obtained differential gene expression data from the CMAP level 5 data  
651 preprocessing step for each of our top hits. Then, we performed gene set enrichment analysis  
652 (GSEA) using *fGSEA* package (75) testing if the gene expression response induced by a cer-



653 tain treatment is enriched for the set of pluripotency-associated genes obtained from (64). The  
 654 calculated Normalized Enrichment Scores (NES) were then aggregated using simple averaging.  
 655 The statistical significance of enrichment across cell lines was assessed using t-test with the null  
 656 hypothesis that the mean of NES across cell types is equal to zero.

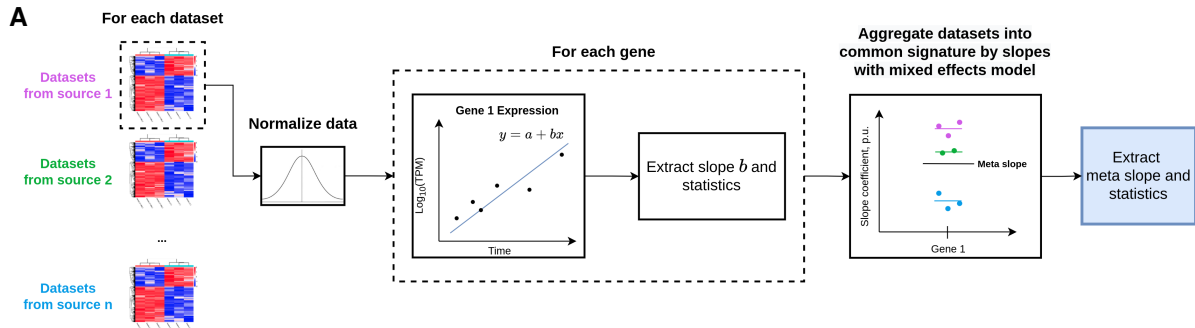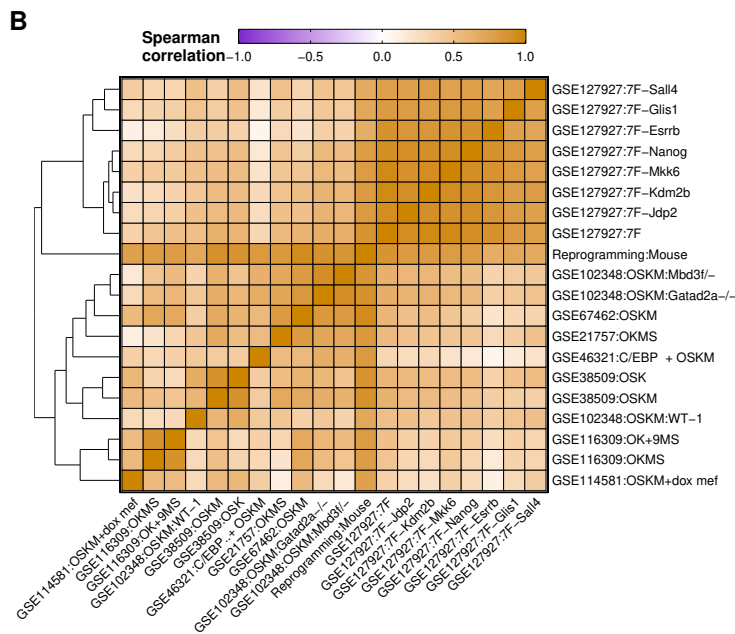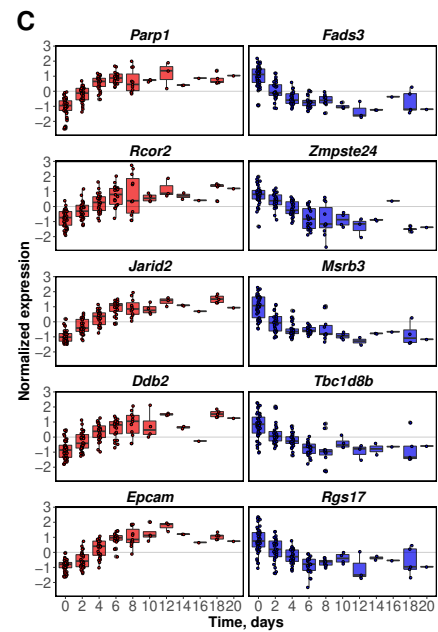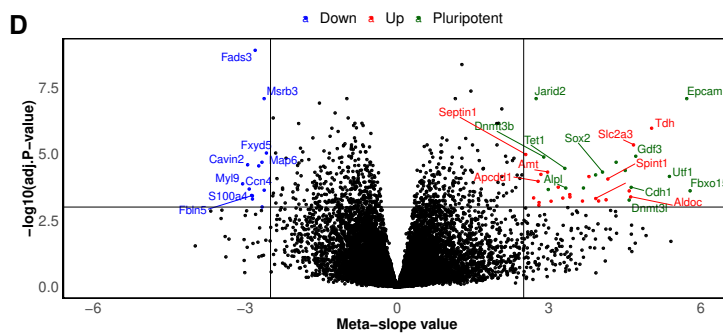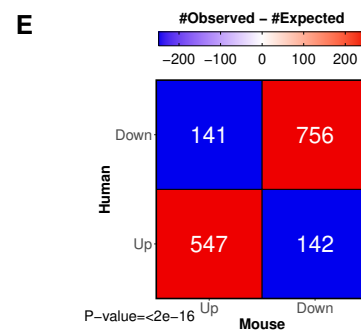

**Fig.1. Construction and validation of the reprogramming signature.** (A) Schematic illustration of the signature construction workflow. (B) Clustering analysis of individual mouse reprogramming datasets and the aggregated signature. GSE IDs of the datasets are accompanied by the description of reprogramming factors applied in corresponding experiments (for details, see Table S1). Cells are colored based on Spearman's correlation coefficient. (C) Expression trajectory of top five upregulated and downregulated genes with the lowest BH-adjusted p-value according to the mouse reprogramming signature. Upregulated and downregulated genes are shown in red and blue, respectively. (D) Volcano plot of meta-slope values extracted from the signature and corresponding BH-adjusted p-values. Each dot represents a single gene. Pluripotency markers are highlighted in green. Significantly upregulated and downregulated genes are shown in red and blue, respectively. The horizontal dashed line represents the significance cut-off (BH adjusted p-value < 0.001), while vertical lines represent meta-slope cut-offs ( $|\log FCI| > 2.5$ ). (E) The overlap of significantly upregulated and downregulated genes between murine and human signatures. Only uniquely mapped orthologs according to Ensembl were considered for analysis. Numbers within cells demonstrate the observed numbers of overlapping orthologous genes, while color represents the difference between observed and expected number of genes in the corresponding cell. The p-value is calculated using Fisher's exact test.

657

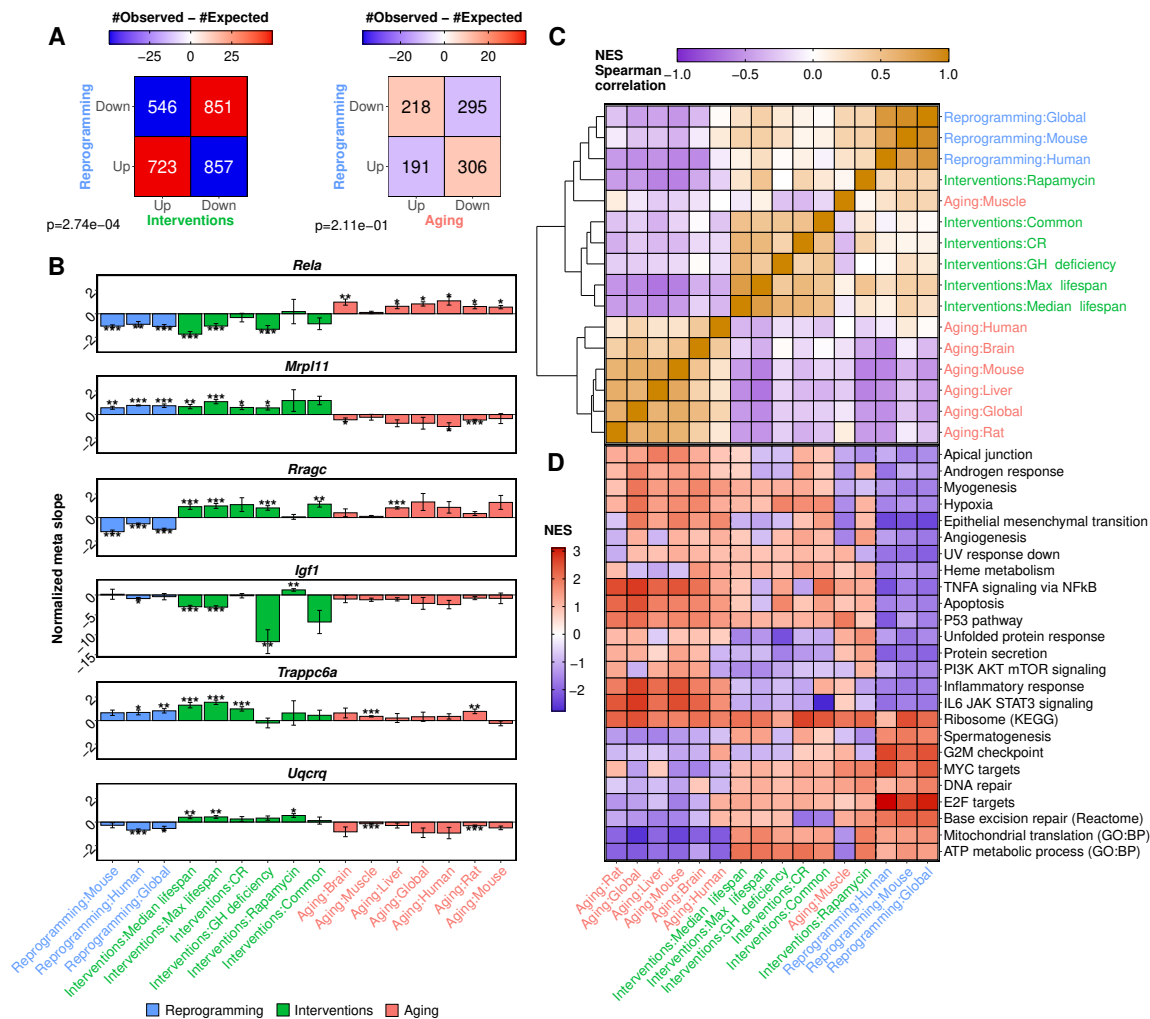

**Fig. 2. The interplay between reprogramming, aging and longevity signatures.** (A) The overlap of upregulated and downregulated genes between groups of signatures. Numbers within cells show the observed numbers of overlapping genes, while color reflects the difference between observed and expected values. p-values are calculated using Fisher's exact test. CR: caloric restriction, GH: growth hormone. (B) Barplots demonstrating the behavior of six particular genes across different signatures. Error bars represent standard errors of normalized meta-slopes. Annotation: \* p.adjusted < 0.05; \*\* p.adjusted < 0.01; \*\*\* p.adjusted < 0.001. (C) Spearman correlation matrix of Normalized Enrichment Scores (NES) obtained using GSEA. (D) Functional terms across different signatures. Color represents NES values. Only the terms with at least one significant enrichment (adjusted p-value < 0.1) are shown. Dashed lines separate reprogramming and aging signature groups from the others.

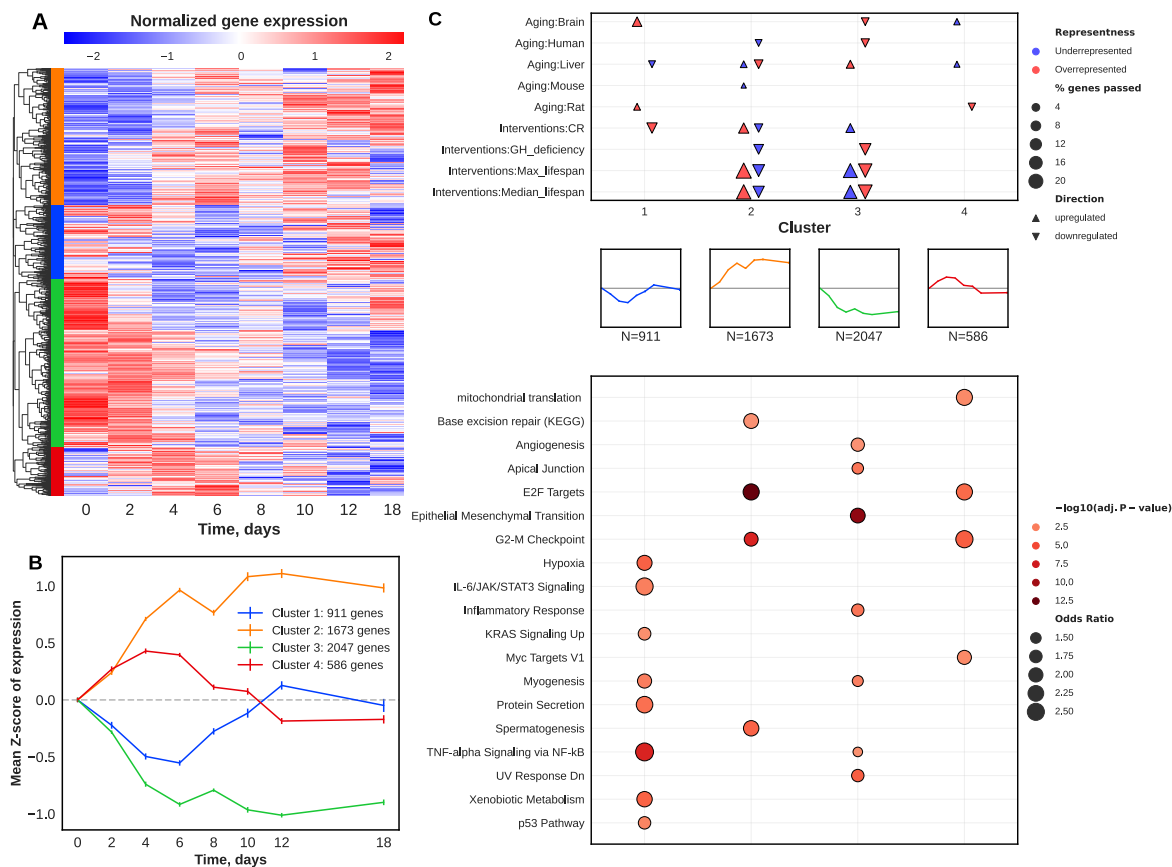

**Fig. 3. Clustering analysis of murine cell reprogramming-associated gene expression changes.** (A) Normalized gene expression during reprogramming. Only genes with statistically significant non-constant expression during reprogramming (ANOVA adjusted p-value < 0.05) are shown. Each row corresponds to a single gene. Colors represent four clusters chosen with the Elbow criterion. (B) Dynamics of cluster centroids during reprogramming. Error bars represent the standard error of the mean. The colors of clusters correspond to panel A. (C) Cluster enrichment analysis. Top panel: enrichment of clusters by genes associated with aging and longevity. Enrichment by up- and downregulated genes is reflected by the direction of triangles. The statistical significance of the overlap is assessed using Fisher's exact test. Overrepresentation and underrepresentation are shown in red and blue, respectively. The absence of triangle reflects non-significant results (BH-adjusted p-value  $\geq$  0.05). Only signatures with significant enrichment in at least one cluster are shown. Triangle size represents the proportion of genes corresponding to a particular signature within a cluster. Middle panel: cluster centroids schematics (from B). Bottom panel: functional enrichment of clusters assessed with hypergeometric test. Only terms with significant enrichment in at least one cluster are shown. Color represents statistical significance of association, while size of the bubbles reflects odds ratio.

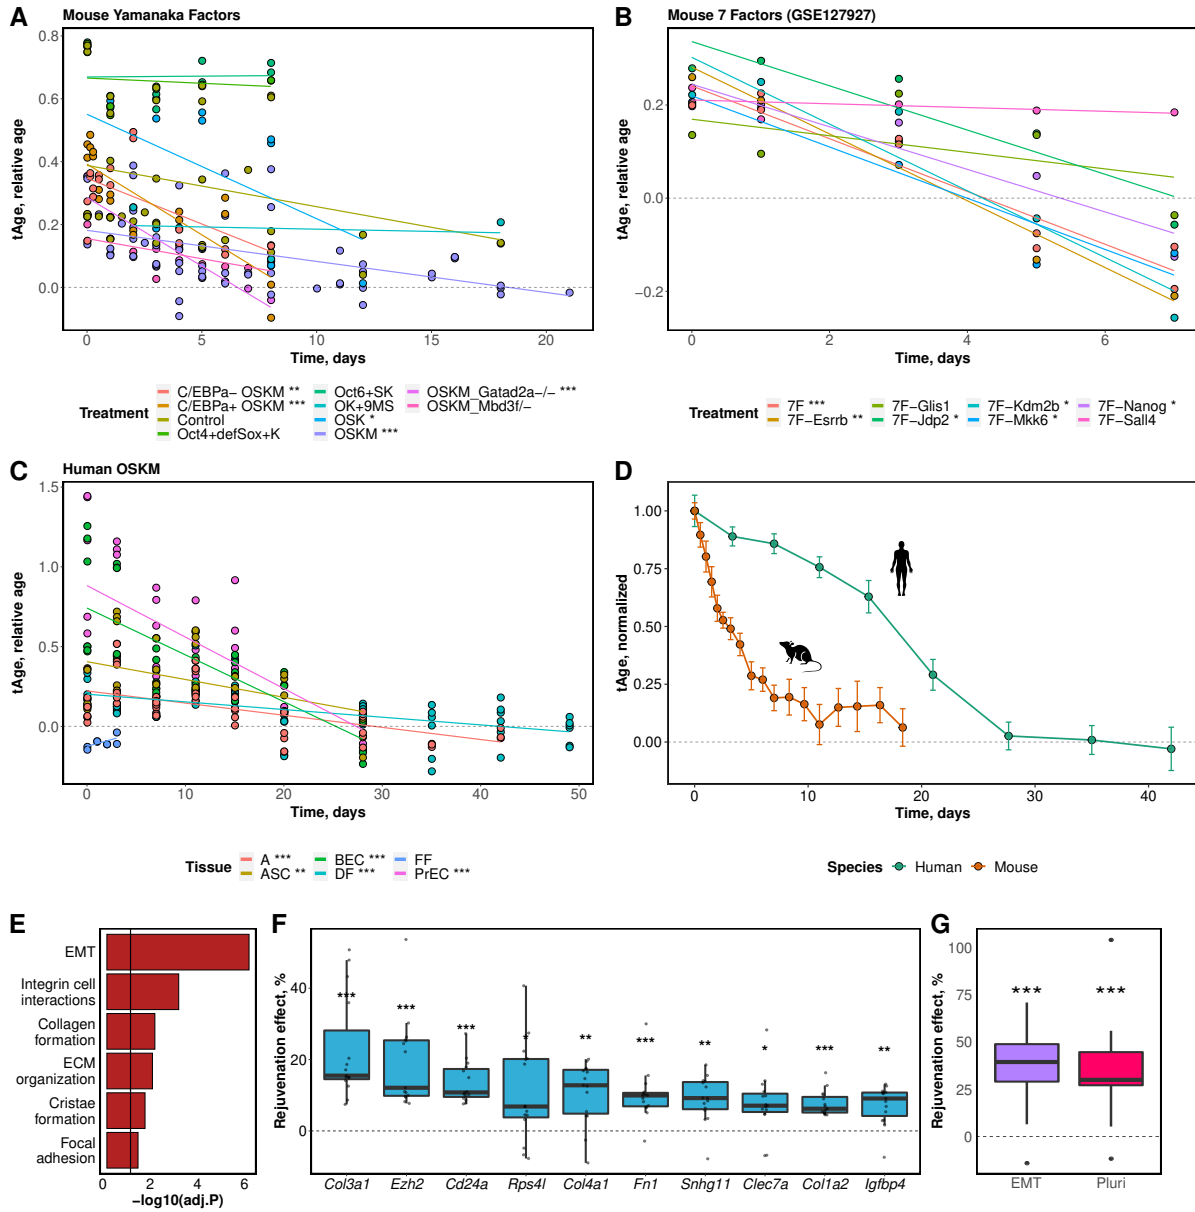

**Fig. 4. The evaluation of gene expression age during reprogramming using multi-tissue transcriptomic clocks.** (A) Transcriptomic age (tAge) changes during reprogramming of mouse cells induced by Yamanaka factors. Lines represent the fitted linear model for the corresponding type of treatment. Stars indicate the significance level of the corresponding linear model slope. Relative age is defined as a chronological age divided by the maximum lifespan for a given species. (B) tAge changes during reprogramming of mouse cells induced by 7 factors from (11). All notations are the same as in panel A. (C) tAge changes during reprogramming of human cell lines. All notations are the same as in panel A. Each color represents a certain cell type. (D) Aggregated trajectories of rejuvenation induced by reprogramming for mouse and human cells. The curve is smoothed using moving average and normalized by the average tAge at the first point of time. Errorbars represent standard errors of the mean. (E) Functional enrichment analysis of genes from the mouse tClock model with significant effect on rejuvenation during reprogramming. The black line shows the significance threshold (adjusted p-value=0.05). Hallmark (epithelial-mesenchymal transition), KEGG (focal adhesion), Reactome (integrin cell surface interactions, extracellular matrix organization, collagen formation), and GO:BP (cristae formation) terms are presented on the barplot. (F) Distributions of rejuvenation effects of top genes associated with murine RIR across the datasets. The top 10 genes are sorted by their average contribution to rejuvenation (see Methods) according to the mouse tClock model. (G) The portion of RIR effect caused by the regulation of EMT (green) and pluripotency-associated (orange) genes. Each boxplot reflects the distribution across individual datasets. ASC: Adipose-derived stem cell, A: human astrocytes, BEC: bronchial epithelium cells, DF: dermal fibroblasts, FF: foreskin fibroblasts, PrEC: Prostate epithelium cells, EMT: Epithelial-Mesenchymal transition, Pluri: pluripotency-associated genes. \* P<0.05, \*\* P<0.01, \*\*\* P<0.001

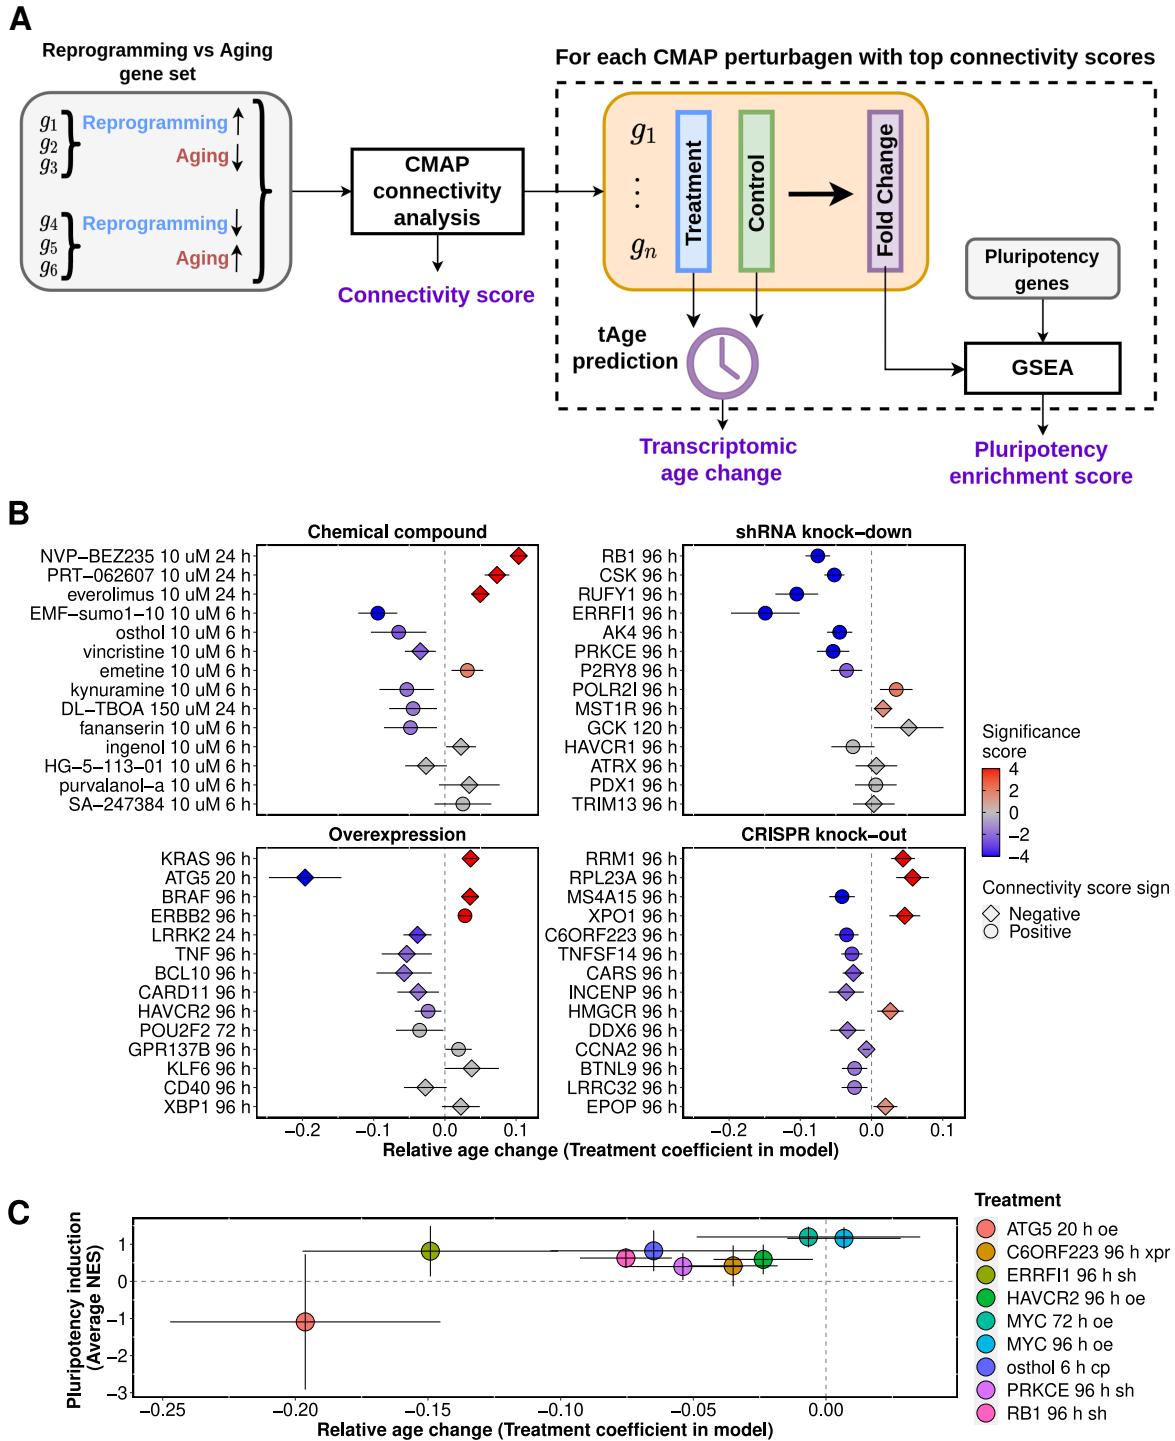

**Fig. 5. Identification of rejuvenation-associated interventions using CMAP.** (A) Schematic illustration of CMAP analysis workflow. (B) Relative age change for different types of interventions. Age change corresponds to the *Treatment* coefficient from the aggregation model (see Methods). Whiskers correspond to the 95% confidence interval. The significance score is computed as  $-\text{Log}_{10}(\text{P-value}) * \text{Sign}(\text{Treatment coefficient})$ . Grey points indicate insignificant coefficients. Circles correspond to coinciding directions of signature connectivity and tClock analysis, while other symbols correspond to opposite directions. (C) Rejuvenation- and pluripotency-inducing effects of selected interventions. Rejuvenation effect was assessed using tClock while pluripotency effect was determined with GSEA. Whiskers correspond to the 95% confidence interval. oe: overexpression, NES: Normalized Enrichment Score, h: hours, sh: gene knockdown with short hairpin RNA, xpr: gene knockout with CRISPR.

661



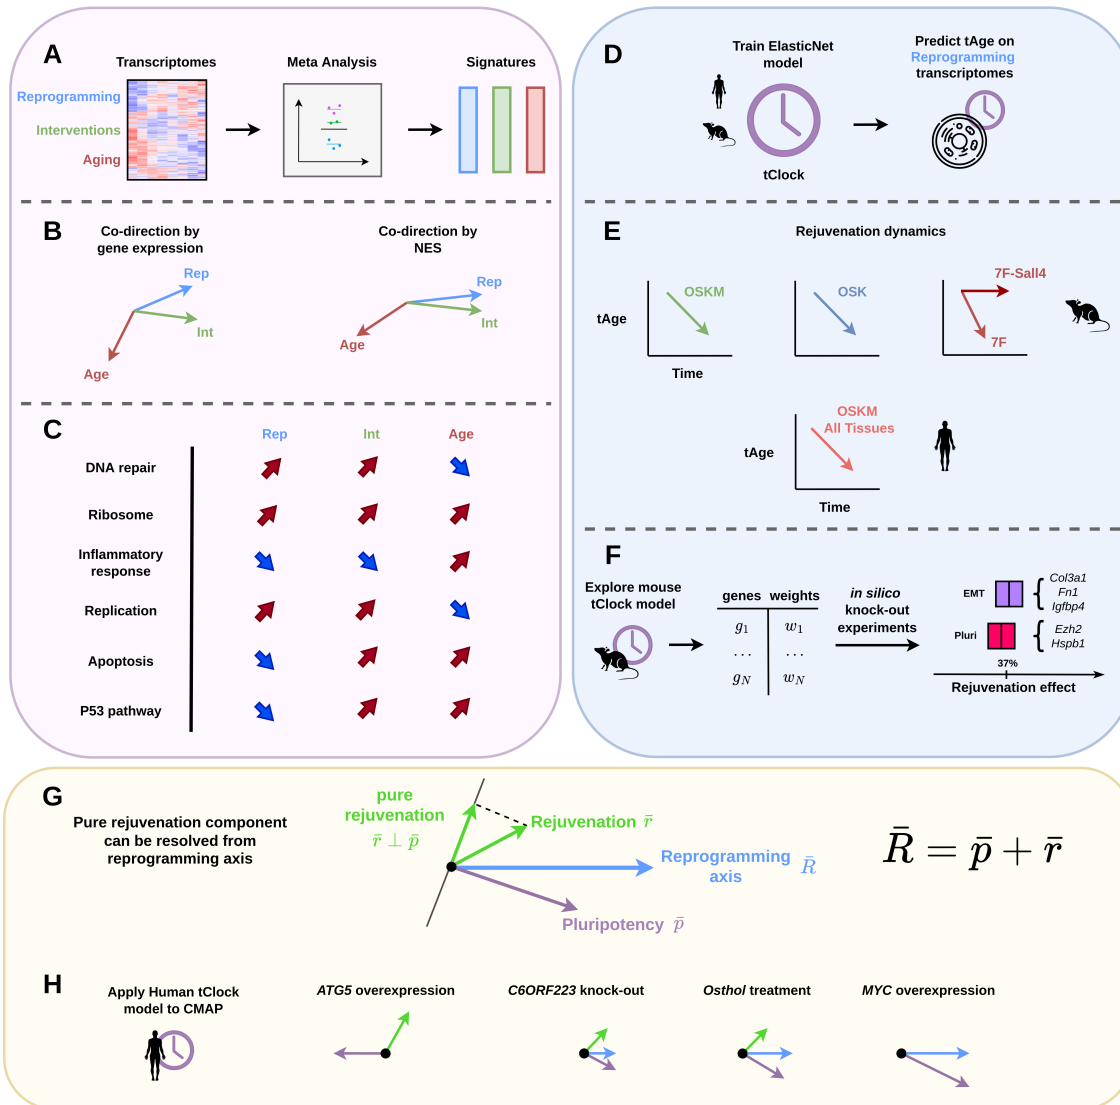

**Fig. 6. Summary of the work.** (A) Gene expression signatures of cellular reprogramming in mouse and human were constructed via aggregation of multiple datasets by meta-analysis technique. (B) Reprogramming signature was positively correlated with biomarkers of longevity interventions and negatively correlated with signatures of aging (meta-slopes correlation). The strength of these associations was amplified at the functional level (NES correlation). (C) Functional behavior of signatures in selected ontological terms. Red and blue arrows denote positive (upregulation) and negative (downregulation) NES scores, respectively. (D) tClock models trained on the mouse or human aging gene expression datasets were used to predict the tAge of reprogramming cells across time. (E) OSK, OSKM Yamanaka factors, and 7F factors consistently decrease tAge of murine and human cells during reprogramming. However, removal of certain factors, such as Sall4, may result in abrogation of both reprogramming and rejuvenation. (F) Genes contributing to the rejuvenation effect of reprogramming were identified. Pluripotency and EMT-associated genes are responsible for approximately 35-37% of RIR. (G) Reprogramming can be considered as a vector being a sum of two components: one moving cell toward pluripotency and the second moving cell to a rejuvenated phenotype. Investigation of gene expression signatures allows to decouple these processes. (H) New interventions affecting one of the reprogramming-induced components can be discovered using instruments provided in this work. Rep: Reprogramming; Int: Lifespan-extending interventions; Pluri: Pluripotency; EMT: Epithelial-mesenchymal transition.

662

## 663 **References**

- 664 1. P. Sen, P. P. Shah, R. Nativio, S. L. Berger, Epigenetic mechanisms of longevity and aging.  
665 *Cell* **166**, 822–839 (2016).
- 666 2. A. Ocampo, P. Reddy, J. C. I. Belmonte, Anti-aging strategies based on cellular reprogram-  
667 ming. *Trends in molecular medicine* **22**, 725–738 (2016).
- 668 3. R. G. Goya, M. Lehmann, P. Chiavellini, M. Canatelli-Mallat, C. B. Hereñú, O. A. Brown,  
669 Rejuvenation by cell reprogramming: a new horizon in gerontology. *Stem Cell Research &*  
670 *Therapy* **9**, 1–9 (2018).
- 671 4. M. Lehmann, M. Canatelli-Mallat, P. Chiavellini, G. M. Cónsole, M. D. Gallardo, R. G.  
672 Goya, Partial reprogramming as an emerging strategy for safe induced cell generation and  
673 rejuvenation. *Current Gene Therapy* **19**, 248–254 (2019).
- 674 5. F. Galkin, B. Zhang, S. E. Dmitriev, V. N. Gladyshev, Reversibility of irreversible aging.  
675 *Ageing research reviews* **49**, 104–114 (2019).
- 676 6. W. Zhang, J. Qu, G.-H. Liu, J. C. I. Belmonte, The ageing epigenome and its rejuvenation.  
677 *Nature reviews Molecular cell biology* **21**, 137–150 (2020).
- 678 7. T. A. Rando, H. Y. Chang, Aging, rejuvenation, and epigenetic reprogramming: resetting  
679 the aging clock. *Cell* **148**, 46–57 (2012).
- 680 8. D. A. Petkovich, D. I. Podolskiy, A. V. Lobanov, S.-G. Lee, R. A. Miller, V. N. Gladyshev,  
681 Using dna methylation profiling to evaluate biological age and longevity interventions. *Cell*  
682 *metabolism* **25**, 954–960 (2017).
- 683 9. K. Takahashi, S. Yamanaka, Induction of pluripotent stem cells from mouse embryonic and  
684 adult fibroblast cultures by defined factors. *cell* **126**, 663–676 (2006).

- 685 10. Y. Rais, A. Zviran, S. Geula, O. Gafni, E. Chomsky, S. Viukov, A. A. Mansour, I. Caspi,  
686 V. Krupalnik, M. Zerbib, *et al.*, Deterministic direct reprogramming of somatic cells to  
687 pluripotency. *Nature* **502**, 65–70 (2013).
- 688 11. B. Wang, L. Wu, D. Li, Y. Liu, J. Guo, C. Li, Y. Yao, Y. Wang, G. Zhao, X. Wang, *et al.*,  
689 Induction of pluripotent stem cells from mouse embryonic fibroblasts by jdp2-jhdm1b-  
690 mkk6-glis1-nanog-essrb-sall4. *Cell reports* **27**, 3473–3485 (2019).
- 691 12. P. Hou, Y. Li, X. Zhang, C. Liu, J. Guan, H. Li, T. Zhao, J. Ye, W. Yang, K. Liu, *et al.*,  
692 Pluripotent stem cells induced from mouse somatic cells by small-molecule compounds.  
693 *Science* **341**, 651–654 (2013).
- 694 13. M. Abad, L. Mosteiro, C. Pantoja, M. Cañamero, T. Rayon, I. Ors, O. Graña, D. Megías,  
695 O. Domínguez, D. Martínez, *et al.*, Reprogramming in vivo produces teratomas and ips  
696 cells with totipotency features. *Nature* **502**, 340–345 (2013).
- 697 14. K. Ohnishi, K. Semi, T. Yamamoto, M. Shimizu, A. Tanaka, K. Mitsunaga, K. Okita, K. Os-  
698 afune, Y. Arioka, T. Maeda, *et al.*, Premature termination of reprogramming in vivo leads  
699 to cancer development through altered epigenetic regulation. *Cell* **156**, 663–677 (2014).
- 700 15. Y. Lu, B. Brommer, X. Tian, A. Krishnan, M. Meer, C. Wang, D. L. Vera, Q. Zeng, D. Yu,  
701 M. S. Bonkowski, *et al.*, Reprogramming to recover youthful epigenetic information and  
702 restore vision. *Nature* **588**, 124–129 (2020).
- 703 16. A. Ocampo, P. Reddy, P. Martinez-Redondo, A. Platero-Luengo, F. Hatanaka, T. Hishida,  
704 M. Li, D. Lam, M. Kurita, E. Beyret, *et al.*, In vivo amelioration of age-associated hallmarks  
705 by partial reprogramming. *Cell* **167**, 1719–1733 (2016).
- 706 17. Y. Chen, F. F. Lüttmann, E. Schoger, H. R. Schöler, L. C. Zelarayán, K.-P. Kim, J. J. Haigh,  
707 J. Kim, T. Braun, Reversible reprogramming of cardiomyocytes to a fetal state drives heart

- 708 regeneration in mice. *Science* **373**, 1537–1540 (2021).
- 709 18. K. C. Browder, P. Reddy, M. Yamamoto, A. Haghani, I. G. Guillen, S. Sahu, C. Wang,  
710 Y. Luque, J. Prieto, L. Shi, *et al.*, In vivo partial reprogramming alters age-associated  
711 molecular changes during physiological aging in mice. *Nature Aging* **2**, 243–253 (2022).
- 712 19. N. Olova, D. J. Simpson, R. E. Marioni, T. Chandra, Partial reprogramming induces a  
713 steady decline in epigenetic age before loss of somatic identity. *Aging cell* **18**, e12877  
714 (2019).
- 715 20. D. Gill, A. Parry, F. Santos, H. Okkenhaug, C. D. Todd, I. Hernando-Herraez, T. M. Stubbs,  
716 I. Milagre, W. Reik, Multi-omic rejuvenation of human cells by maturation phase transient  
717 reprogramming. *Elife* **11**, e71624 (2022).
- 718 21. S. Horvath, Dna methylation age of human tissues and cell types. *Genome biology* **14**, 1–20  
719 (2013).
- 720 22. A. E. Roux, C. Zhang, J. Paw, J. Zavala-Solorio, E. Malahias, T. Vijay, G. Kolumam,  
721 C. Kenyon, J. C. Kimmel, Diverse partial reprogramming strategies restore youthful gene  
722 expression and transiently suppress cell identity. *Cell Systems* (2022).
- 723 23. G. Schiebinger, J. Shu, M. Tabaka, B. Cleary, V. Subramanian, A. Solomon, J. Gould,  
724 S. Liu, S. Lin, P. Berube, *et al.*, Optimal-transport analysis of single-cell gene expression  
725 identifies developmental trajectories in reprogramming. *Cell* **176**, 928–943 (2019).
- 726 24. R. Morris, I. Sancho-Martinez, T. O. Sharpee, J. C. I. Belmonte, Mathematical approaches  
727 to modeling development and reprogramming. *Proceedings of the National Academy of*  
728 *Sciences* **111**, 5076–5082 (2014).
- 729 25. R. Hannam, A. Annibale, R. Kühn, Cell reprogramming modelled as transitions in a hi-

- 730 erarchy of cell cycles. *Journal of Physics A: Mathematical and Theoretical* **50**, 425601  
731 (2017).
- 732 26. L. L. Liu, J. Brumbaugh, O. Bar-Nur, Z. Smith, M. Stadtfeld, A. Meissner, K. Hochedlinger,  
733 F. Michor, Probabilistic modeling of reprogramming to induced pluripotent stem cells. *Cell*  
734 *reports* **17**, 3395–3406 (2016).
- 735 27. A. Tyshkovskiy, P. Bozaykut, A. A. Borodinova, M. V. Gerashchenko, G. P. Ables, M. Gar-  
736 ratt, P. Khaitovich, C. B. Clish, R. A. Miller, V. N. Gladyshev, Identification and application  
737 of gene expression signatures associated with lifespan extension. *Cell metabolism* **30**, 573–  
738 593 (2019).
- 739 28. J. P. de Magalhaes, O. Toussaint, Genage: a genomic and proteomic network map of human  
740 ageing. *FEBS letters* **571**, 243–247 (2004).
- 741 29. A. Mangerich, A. Bürkle, Pleiotropic cellular functions of parp1 in longevity and aging:  
742 genome maintenance meets inflammation. *Oxidative medicine and cellular longevity* **2012**  
743 (2012).
- 744 30. L. Hou, Y. Wei, Y. Lin, X. Wang, Y. Lai, M. Yin, Y. Chen, X. Guo, S. Wu, Y. Zhu, *et al.*,  
745 Concurrent binding to dna and rna facilitates the pluripotency reprogramming activity of  
746 sox2. *Nucleic acids research* **48**, 3869–3887 (2020).
- 747 31. I. Varela, J. Cadinanos, A. M. Pendás, A. Gutiérrez-Fernández, A. R. Folgueras, L. M.  
748 Sánchez, Z. Zhou, F. J. Rodriguez, C. L. Stewart, J. A. Vega, *et al.*, Accelerated ageing  
749 in mice deficient in zmpste24 protease is linked to p53 signalling activation. *Nature* **437**,  
750 564–568 (2005).
- 751 32. J. M. Polo, E. Anderssen, R. M. Walsh, B. A. Schwarz, C. M. Nefzger, S. M. Lim,  
752 M. Borkent, E. Apostolou, S. Alaei, J. Cloutier, *et al.*, A molecular roadmap of repro-

- 753       gramming somatic cells into ips cells. *Cell* **151**, 1617–1632 (2012).
- 754 33. W. A. Pastor, W. Liu, D. Chen, J. Ho, R. Kim, T. J. Hunt, A. Lukianchikov, X. Liu, J. M.  
755 Polo, S. E. Jacobsen, *et al.*, Tfp2c regulates transcription in human naive pluripotency by  
756 opening enhancers. *Nature cell biology* **20**, 553–564 (2018).
- 757 34. P. Samavarchi-Tehrani, A. Golipour, L. David, H.-k. Sung, T. A. Beyer, A. Datti, K. Wolt-  
758 jen, A. Nagy, J. L. Wrana, Functional genomics reveals a bmp-driven mesenchymal-to-  
759 epithelial transition in the initiation of somatic cell reprogramming. *Cell stem cell* **7**, 64–77  
760 (2010).
- 761 35. T. S. Mikkelsen, J. Hanna, X. Zhang, M. Ku, M. Wernig, P. Schorderet, B. E. Bernstein,  
762 R. Jaenisch, E. S. Lander, A. Meissner, Dissecting direct reprogramming through integra-  
763 tive genomic analysis. *Nature* **454**, 49–55 (2008).
- 764 36. K. Fu, C. Chronis, A. Soufi, G. Bonora, M. Edwards, S. T. Smale, K. S. Zaret, K. Plath,  
765 M. Pellegrini, Comparison of reprogramming factor targets reveals both species-specific  
766 and conserved mechanisms in early ipsc reprogramming. *BMC genomics* **19**, 1–13 (2018).
- 767 37. J. S. Tilstra, C. L. Clauson, L. J. Niedernhofer, P. D. Robbins, Nf- $\kappa$ b in aging and disease.  
768 *Aging and disease* **2**, 449 (2011).
- 769 38. C. Soria-Valles, F. G. Osorio, A. Gutiérrez-Fernández, A. De Los Angeles, C. Bueno,  
770 P. Menéndez, J. I. Martín-Subero, G. Q. Daley, J. M. Freije, C. López-Otín, Nf- $\kappa$ b acti-  
771 vation impairs somatic cell reprogramming in ageing. *Nature cell biology* **17**, 1004–1013  
772 (2015).
- 773 39. M. Matecic, D. L. Smith Jr, X. Pan, N. Maqani, S. Bekiranov, J. D. Boeke, J. S. Smith,  
774 A microarray-based genetic screen for yeast chronological aging factors. *PLoS genetics* **6**,  
775 e1000921 (2010).

- 776 40. P. A. Long, M. T. Zimmermann, M. Kim, J. M. Evans, X. Xu, T. M. Olson, De novo rragc  
777 mutation activates mtorc1 signaling in syndromic fetal dilated cardiomyopathy. *Human*  
778 *genetics* **135**, 909–917 (2016).
- 779 41. C. L. Green, D. W. Lamming, L. Fontana, Molecular mechanisms of dietary restriction  
780 promoting health and longevity. *Nature Reviews Molecular Cell Biology* pp. 1–18 (2021).
- 781 42. G. G. Hesketh, F. Papazotos, J. Pawling, D. Rajendran, J. D. Knight, S. Martinez,  
782 M. Taipale, D. Schramek, J. W. Dennis, A.-C. Gingras, The gator–rag gtpase pathway  
783 inhibits mtorc1 activation by lysosome-derived amino acids. *Science* **370**, 351–356 (2020).
- 784 43. S. Wang, P. Xia, M. Rehm, Z. Fan, Autophagy and cell reprogramming. *Cellular and*  
785 *molecular life sciences* **72**, 1699–1713 (2015).
- 786 44. N. A. O’Leary, M. W. Wright, J. R. Brister, S. Ciufu, D. Haddad, R. McVeigh, B. Rajput,  
787 B. Robertse, B. Smith-White, D. Ako-Adjei, *et al.*, Reference sequence (refseq) database  
788 at ncbi: current status, taxonomic expansion, and functional annotation. *Nucleic acids*  
789 *research* **44**, D733–D745 (2016).
- 790 45. A. Subramanian, P. Tamayo, V. K. Mootha, S. Mukherjee, B. L. Ebert, M. A. Gillette,  
791 A. Paulovich, S. L. Pomeroy, T. R. Golub, E. S. Lander, *et al.*, Gene set enrichment anal-  
792 ysis: a knowledge-based approach for interpreting genome-wide expression profiles. *Pro-*  
793 *ceedings of the National Academy of Sciences* **102**, 15545–15550 (2005).
- 794 46. Z. D. Smith, C. Sindhu, A. Meissner, Molecular features of cellular reprogramming and  
795 development. *Nature reviews Molecular cell biology* **17**, 139–154 (2016).
- 796 47. M. Ohnuki, K. Tanabe, K. Sutou, I. Teramoto, Y. Sawamura, M. Narita, M. Nakamura,  
797 Y. Tokunaga, M. Nakamura, A. Watanabe, *et al.*, Dynamic regulation of human endogenous



- 798 retroviruses mediates factor-induced reprogramming and differentiation potential. *Proceed-*  
799 *ings of the National Academy of Sciences* **111**, 12426–12431 (2014).
- 800 48. H. Kagawa, R. Shimamoto, S.-I. Kim, F. Ocegüera-Yanez, T. Yamamoto, T. Schroeder,  
801 K. Woltjen, *Ovol1* influences the determination and expansion of ipsc reprogramming in-  
802 termediates. *Stem cell reports* **12**, 319–332 (2019).
- 803 49. N. Mor, Y. Rais, D. Sheban, S. Peles, A. Aguilera-Castrejon, A. Zviran, D. Elinger,  
804 S. Viukov, S. Geula, V. Krupalnik, *et al.*, Neutralizing *gatad2a-chd4-mbd3/nurd* complex  
805 facilitates deterministic induction of naive pluripotency. *Cell stem cell* **23**, 412–425 (2018).
- 806 50. D.-M. Shin, R. Liu, W. Wu, S. J. Waigel, W. Zacharias, M. Z. Ratajczak, M. Kucia, Global  
807 gene expression analysis of very small embryonic-like stem cells reveals that the *ezh2-*  
808 *dependent bivalent domain* mechanism contributes to their pluripotent state. *Stem cells and*  
809 *development* **21**, 1639–1652 (2012).
- 810 51. J. Lamb, E. D. Crawford, D. Peck, J. W. Modell, I. C. Blat, M. J. Wrobel, J. Lerner, J.-P.  
811 Brunet, A. Subramanian, K. N. Ross, *et al.*, The connectivity map: using gene-expression  
812 signatures to connect small molecules, genes, and disease. *science* **313**, 1929–1935 (2006).
- 813 52. L.-H. Luo, D.-M. Li, Y.-L. Wang, K. Wang, L.-X. Gao, S. Li, J.-G. Yang, C.-L. Li, W. Feng,  
814 H. Guo, *Tim3/galectin-9* alleviates the inflammation of tao patients via suppressing *akt/nf-*  
815 *kb* signaling pathway. *Biochemical and biophysical research communications* **491**, 966–  
816 972 (2017).
- 817 53. S. Guo, Y. Li, B. Wei, W. Liu, R. Li, W. Cheng, X. Zhang, X. He, X. Li, C. Duan, *Tim-*  
818 *3* deteriorates neuroinflammatory and neurocyte apoptosis after subarachnoid hemorrhage  
819 through the *nrf2/hmgb1* signaling pathway in rats. *Aging (Albany NY)* **12**, 21161 (2020).

- 820 54. M. Wick, C. Bürger, M. Funk, R. Müller, Identification of a novel mitogen-inducible gene  
821 (mig-6): regulation during g1 progression and differentiation. *Experimental cell research*  
822 **219**, 527–535 (1995).
- 823 55. M. Milewska, W. Kolch, Mig-6 participates in the regulation of cell senescence and  
824 retinoblastoma protein phosphorylation. *Cellular Signalling* **26**, 1870–1877 (2014).
- 825 56. B. Xie, L. Zhao, H. Chen, B. Jin, Z. Mao, Z. Yao, The mitogen-inducible gene-6 is involved  
826 in regulation of cellular senescence in normal diploid fibroblasts. *Biology of the Cell* **105**,  
827 488–499 (2013).
- 828 57. H. Fan, Z. Gao, K. Ji, X. Li, J. Wu, Y. Liu, X. Wang, H. Liang, Y. Liu, X. Li, *et al.*, The  
829 in vitro and in vivo anti-inflammatory effect of osthole, the major natural coumarin from  
830 *cnidium monnieri* (L.) cuss, via the blocking of the activation of the nf- $\kappa$ b and mapk/p38  
831 pathways. *Phytomedicine* **58**, 152864 (2019).
- 832 58. W.-C. Kan, J.-Y. Hwang, L.-Y. Chuang, J.-Y. Guh, Y.-L. Ye, Y.-L. Yang, J.-S. Huang, Effect  
833 of osthole on advanced glycation end products-induced renal tubular hypertrophy and role  
834 of klotho in its mechanism of action. *Phytomedicine* **53**, 205–212 (2019).
- 835 59. G. Rajendran, D. Dutta, J. Hong, A. Paul, B. Saha, B. Mahato, S. Ray, P. Home, A. Ganguly,  
836 M. L. Weiss, *et al.*, Inhibition of protein kinase c signaling maintains rat embryonic stem  
837 cell pluripotency. *Journal of Biological Chemistry* **288**, 24351–24362 (2013).
- 838 60. C.-Y. Cheng, K. Yamashiro, L. Jia Chen, J. Ahn, L. Huang, L. Huang, C. M. G. Cheung,  
839 M. Miyake, P. D. Cackett, I. Y. Yeo, *et al.*, New loci and coding variants confer risk for  
840 age-related macular degeneration in east asians. *Nature communications* **6**, 1–10 (2015).
- 841 61. S. H. Choi, D. Ruggiero, R. Sorice, C. Song, T. Nutile, A. Vernon Smith, M. P. Concas,  
842 M. Traglia, C. Barbieri, N. C. Ndiaye, *et al.*, Six novel loci associated with circulating vegf

- 843 levels identified by a meta-analysis of genome-wide association studies. *PLoS genetics* **12**,  
844 e1005874 (2016).
- 845 62. Y. Situ, Q. Xu, L. Deng, Y. Zhu, R. Gao, L. Lei, Z. Shao, System analysis of vegfa in renal  
846 cell carcinoma: The expression, prognosis, gene regulation network and regulation targets.  
847 *The International Journal of Biological Markers* p. 17246008211063501 (2021).
- 848 63. J.-O. Pyo, S.-M. Yoo, H.-H. Ahn, J. Nah, S.-H. Hong, T.-I. Kam, S. Jung, Y.-K. Jung,  
849 Overexpression of atg5 in mice activates autophagy and extends lifespan. *Nature commu-  
850 nications* **4**, 1–9 (2013).
- 851 64. C. T. Maguire, B. L. Demarest, J. T. Hill, J. D. Palmer, A. R. Brothman, H. J. Yost, M. L.  
852 Condic, Genome-wide analysis reveals the unique stem cell identity of human amniocytes.  
853 *PloS one* **8**, e53372 (2013).
- 854 65. D. J. Simpson, N. N. Olova, T. Chandra, Cellular reprogramming and epigenetic rejuvena-  
855 tion. *Clinical Epigenetics* **13**, 1–10 (2021).
- 856 66. M. V. Meer, D. I. Podolskiy, A. Tyshkovskiy, V. N. Gladyshev, A whole lifespan mouse  
857 multi-tissue dna methylation clock. *Elife* **7**, e40675 (2018).
- 858 67. B. Zhang, A. Trapp, C. Kerepesi, V. N. Gladyshev, Emerging rejuvenation strate-  
859 gies—reducing the biological age. *Aging Cell* p. e13538 (2021).
- 860 68. M. E. Ritchie, B. Phipson, D. Wu, Y. Hu, C. W. Law, W. Shi, G. K. Smyth, limma powers  
861 differential expression analyses for rna-sequencing and microarray studies. *Nucleic acids  
862 research* **43**, e47–e47 (2015).
- 863 69. W. Viechtbauer, Conducting meta-analyses in R with the metafor package. *Journal of  
864 Statistical Software* **36**, 1–48 (2010).

- 865 70. Y. Benjamini, Y. Hochberg, Controlling the false discovery rate: a practical and powerful  
866 approach to multiple testing. *Journal of the Royal statistical society: series B (Method-*  
867 *ological)* **57**, 289–300 (1995).
- 868 71. M. Harrer, P. Cuijpers, F. T. A. D. D. Ebert, *Doing Meta-Analysis With R: A Hands-On*  
869 *Guide* (Chapman Hall/CRC Press, Boca Raton, FL and London, 2021), first edn.
- 870 72. D. J. Wilson, The harmonic mean p-value for combining dependent tests. *Proceedings of*  
871 *the National Academy of Sciences* **116**, 1195–1200 (2019).
- 872 73. F. Pedregosa, G. Varoquaux, A. Gramfort, V. Michel, B. Thirion, O. Grisel, M. Blon-  
873 del, P. Prettenhofer, R. Weiss, V. Dubourg, J. Vanderplas, A. Passos, D. Cournapeau,  
874 M. Brucher, M. Perrot, E. Duchesnay, Scikit-learn: Machine learning in Python. *Journal*  
875 *of Machine Learning Research* **12**, 2825–2830 (2011).
- 876 74. S. Seabold, J. Perktold, *9th Python in Science Conference* (2010).
- 877 75. G. Korotkevich, V. Sukhov, N. Budin, B. Shpak, M. N. Artyomov, A. Sergushichev, Fast  
878 gene set enrichment analysis. *BioRxiv* p. 060012 (2021).

879 **Acknowledgements:** We thank Ruslan Gumerov for help with data collection. A.T. and S.E.D.  
880 were members of Interdisciplinary Scientific and Educational School of Moscow University  
881 “Molecular Technologies of the Living Systems and Synthetic Biology”.

882 **Funding:** The study was supported by the Russian Science Foundation grants no. 21-74-10102  
883 to E.E.K. (data collection and preprocessing) and no. 18-14-00291 to S.E.D. (clustering analy-  
884 sis, signature construction, tAge clock and CMAP analyses).

885 **Author Contributions** A.T. and S.E.D. conceived and designed this research; D.K. performed  
886 research and data analysis; D.K., E.E.K, V.N.G., S.E.D. and A.T were involved in discussion  
887 and interpretation; D.K. and A.T. wrote the manuscript with contributions from all other au-

888 thors.

889 **Competing Interests** The authors declare that they have no competing financial interests.

890 **Data and materials availability:** Additional data and materials are available online.



900 **Table S1. (separate file)** Datasets used in this study.

901 **Table S2. (separate file)** Table of pluripotency-associated genes for mouse and human.

902 **Table S3. (separate file)** Top 1000 genes from the mouse reprogramming signature sorted by  
903 statistical significance.
